# Supplementary material for: Structure–Activity Relationship of the Thiacalix[4]arenes Family with Sulfobetaine Fragments: Self-Assembly and Cytotoxic Effect against Cancer Cell Lines
Source: MDPI journal article supplement (doi:10.3390/molecules27041364), 2022-02-17
Supplement: s1 [file s1]

# Structure–Activity Relationship of the Thiactalix[4]arenes Family with Sulfobetaine Fragments: Self-Assembly and Cytotoxic Effect against Cancer Cell Lines

Luidmila Yakimova <sup>1,\*</sup>, Aisylu Kunafina <sup>1</sup>, Aigul Nugmanova <sup>1</sup>, Pavel Padnya <sup>1</sup>, Alexandra Voloshina <sup>2</sup>, Konstantin Petrov <sup>2</sup> and Ivan Stoikov <sup>1,\*</sup>

<sup>1</sup> A.M. Butlerov' Chemistry Institute, Kazan Federal University, 18 Kremlevskaya Street, 420008 Kazan, Russia; ais.kunaf@yandex.ru (A.K.); aygul9pul9@mail.ru (A.N.); padnya.ksu@gmail.com (P.P.)

<sup>2</sup> Arbuzov Institute of Organic and Physical Chemistry, FRC Kazan Scientific Center of RAS, 8 Arbuzov Street, 420088 Kazan, Russia; microbi@iopc.ru (A.V.); kpetrov2005@mail.ru (K.P.)

\* Correspondence: mila.yakimova@mail.ru (L.Y.); ivan.stoikov@mail.ru (I.S.); Tel.: +7-843-233-7241 (I.S.)

## Electronic Supplementary Information (33 pages)

1. NMR, ESI, IR spectra of compounds **3-5**.
2. Dynamic light scattering
3. UV spectra
4. NMR spectra of associates
5. Tables

### 1. NMR, ESI, IR spectra of compounds **3-5**

#### *General procedure for the synthesis of compound **3-5***

The mixture of 5,11,17,23-tetra-*tert*-butyl-25,26,27,28-tetrakis[(N-(3',3'-dimethylaminopropyl)-carbamoylmethoxy]-2,8,14,20-tetrathiactalix[4]arene (**2-cone**, **2-paco**, **2-alt**) (0.20 g, 0.16 mmol) and 1,3-propanesultone (0.64 mmol) in 15 ml of solvent (CH<sub>3</sub>CN) was refluxed for 72 hours. After cooling, solvent was evaporated under reduce pressure.

**5,11,17,23-Tetra-*tert*-butyl-25,26,27,28-tetrakis[(N-(3',3'-dimethyl-3'-{3''-sulfonatopropyl})ammoniumpropyl)-carbamoylmethoxy]-2,8,14,20-tetrathiactalix[4]arene (cone) (**3**)**. Yield 0.19 g (79 %), Mp: 258°C. <sup>1</sup>H NMR (DMSO-*d*<sub>6</sub>, δ, ppm, J/Hz): 1.07 (s, 36H, (CH<sub>3</sub>)<sub>3</sub>C), 2.01 (m, 8H, -NCH<sub>2</sub>CH<sub>2</sub>CH<sub>2</sub>NH), 1.95 (m, 8H, -NCH<sub>2</sub>CH<sub>2</sub>CH<sub>2</sub>SO<sub>3</sub><sup>-</sup>), 2.01 (m, 8H, -NCH<sub>2</sub>CH<sub>2</sub>CH<sub>2</sub>NH), 2.52 (m, 8H, -NCH<sub>2</sub>CH<sub>2</sub>CH<sub>2</sub>SO<sub>3</sub><sup>-</sup>), 3.04 (s, 24H, (CH<sub>3</sub>)<sub>2</sub>N<sup>+</sup>), 3.26 (m, 8H, NCH<sub>2</sub>CH<sub>2</sub>CH<sub>2</sub>NH), 3.36 (m, 8H, -NCH<sub>2</sub>CH<sub>2</sub>CH<sub>2</sub>SO<sub>3</sub><sup>-</sup>), 3.44 (m, 8H, NCH<sub>2</sub>CH<sub>2</sub>CH<sub>2</sub>NH), 4.84 (s,

8H, OCH<sub>2</sub>CO), 7.40 (s, 8H, ArH), 8.52 (br. s, 4H, CONH). <sup>13</sup>C NMR (DMSO-*d*<sub>6</sub>, δ, ppm): 68.24, 157.82, 146.70, 134.51, 128.15, 74.11, 61.98, 60.73, 50.30, 47.74, 35.50, 33.97, 30.76, 22.44, 18.89. El. Anal. Calcd for C<sub>80</sub>H<sub>128</sub>N<sub>8</sub>O<sub>20</sub>S<sub>8</sub> (%): C 54.03 %, H 7.25 %, N 6.30 %, S 14.42 %. Found (%): C 54.50 %, H 7.18 %, N 6.59 %, S 14.45 %. FTIR ATR (ν, cm<sup>-1</sup>): 1663 (C=O), 2958 (N<sup>+</sup>), 3322 (NH). MS (ESI): calculated 1776.8 [M+2Na]<sup>2+</sup>, found: 1776.3 [M+2Na]<sup>2+</sup>.

**5,11,17,23-Tetra-*tert*-butyl-25,26,27,28-tetrakis[(N-(3',3'-dimethyl-3'-{3''-sulfonatopropyl})ammoniumpropyl)-carbamoylmethoxy]-2,8,14,20-tetrathiacalix[4]arene** (*partial cone*) (**4**). Yield 0.26 g (95 %). <sup>1</sup>H NMR (DMSO-*d*<sub>6</sub>, δ, ppm, *J*/Hz): 1.01 (s, 18H, (CH<sub>3</sub>)<sub>3</sub>C), 1.28 (s, 9H, (CH<sub>3</sub>)<sub>3</sub>C), 1.29 (s, 9H, (CH<sub>3</sub>)<sub>3</sub>C), 1.80-2.04 (m, 16H, -N<sup>+</sup>CH<sub>2</sub>CH<sub>2</sub>CH<sub>2</sub>SO<sub>3</sub><sup>-</sup>, -NCH<sub>2</sub>CH<sub>2</sub>CH<sub>2</sub>NH), 2.45 (m, 8H, -N<sup>+</sup>CH<sub>2</sub>CH<sub>2</sub>CH<sub>2</sub>SO<sub>3</sub><sup>-</sup>), 2.97-3.03 (m, 24H, (CH<sub>3</sub>)<sub>2</sub>N<sup>+</sup>), 3.14-3.30 (m, 16H, N<sup>+</sup>CH<sub>2</sub>CH<sub>2</sub>CH<sub>2</sub>NH, -N<sup>+</sup>CH<sub>2</sub>CH<sub>2</sub>CH<sub>2</sub>SO<sub>3</sub><sup>-</sup>), 3.4 (m, 8H, N<sup>+</sup>CH<sub>2</sub>CH<sub>2</sub>CH<sub>2</sub>NH), 4.36 (d, 2H, OCH<sub>2</sub>CO, <sup>2</sup>*J*<sub>HH</sub>=13.6 Hz), 4.46 (s, 2H, OCH<sub>2</sub>CO), 4.54 (s, 2H, OCH<sub>2</sub>CO), 4.82 (d, 2H, OCH<sub>2</sub>CO, <sup>2</sup>*J*<sub>HH</sub>=13.6 Hz), 7.02 (m, 2H, ArH), 7.64 (m, 2H, ArH), 7.67 (s, 2H, ArH), 7.76 (s, 2H, ArH), 8.32 (m, 2H, CONH), 8.45 (m, 2H, CONH). <sup>13</sup>C NMR (DMSO-*d*<sub>6</sub>, δ, ppm): 169.21, 168.40, 167.51, 160.02, 157.70, 147.04, 146.08, 135.92, 135.31, 134.44, 128.48, 127.95, 127.49, 126.92, 73.17, 63.07, 62.67, 61.46, 61.35, 50.49, 48.09, 36.09, 34.45, 34.37, 34.28, 31.48, 31.19, 22.76, 22.68, 19.32. FTIR ATR (ν, cm<sup>-1</sup>): 1663 (C=O), 2954 (N<sup>+</sup>), 3429 (NH). El. Anal. Calcd for C<sub>80</sub>H<sub>128</sub>N<sub>8</sub>O<sub>20</sub>S<sub>8</sub> (%): C 54.03 %, H 7.25 %, N 6.30 %, S 14.42 %. Found (%): C 54.47 %, H 7.17 %, N 6.57 %, S 14.41 %. MS (ESI): calculated 911.339 [M+2Na]<sup>2+</sup>, 615.222 [M+3Na]<sup>3+</sup>, 607.895 [M+2Na+H]<sup>3+</sup>, found: 911.337 [M+2Na]<sup>2+</sup>, 615.221 [M+3Na]<sup>3+</sup>, 607.893 [M+2Na+H]<sup>3+</sup>.

**5,11,17,23-Tetra-*tert*-butyl-25,26,27,28-tetrakis[(N-(3',3'-dimethyl-3'-{3''-sulfonatopropyl})ammoniumpropyl)-carbamoylmethoxy]-2,8,14,20-tetrathiacalix[4]arene** (*1,3-alternate*) (**5**). Yield 0.25 g (91 %). <sup>1</sup>H NMR (DMSO-*d*<sub>6</sub>, δ, ppm, *J*/Hz): 1.20 (s, 36H, (CH<sub>3</sub>)<sub>3</sub>C), 1.89 (m, 8H, -NCH<sub>2</sub>CH<sub>2</sub>CH<sub>2</sub>NH), 1.99 (m, 8H, -N<sup>+</sup>CH<sub>2</sub>CH<sub>2</sub>CH<sub>2</sub>SO<sub>3</sub><sup>-</sup>), 2.06 (m, 8H, -N<sup>+</sup>CH<sub>2</sub>CH<sub>2</sub>CH<sub>2</sub>SO<sub>3</sub><sup>-</sup>), 3.01 (s, 24H, (CH<sub>3</sub>)<sub>2</sub>N<sup>+</sup>), 3.18 (m, 8H, -N<sup>+</sup>CH<sub>2</sub>CH<sub>2</sub>CH<sub>2</sub>SO<sub>3</sub><sup>-</sup>), 3.30 (m, 8H, NCH<sub>2</sub>CH<sub>2</sub>CH<sub>2</sub>NH), 3.43 (m, 8H, NCH<sub>2</sub>CH<sub>2</sub>CH<sub>2</sub>NH), 4.01 (s, 8H, OCH<sub>2</sub>CO), 7.60 (s, 8H, ArH), 8.06 (m, 4H, CONH). <sup>13</sup>C NMR (DMSO-*d*<sub>6</sub>, δ, ppm): 167.79, 157.64, 146.54, 133.50, 127.98, 71.54, 62.84, 61.39, 50.52, 48.09, 39.90, 36.19, 34.37, 31.27, 22.84, 19.32. FTIR ATR (ν, cm<sup>-1</sup>): 1657 (C=O), 2957 (N<sup>+</sup>) 3300 (NH). El. Anal. Calcd for C<sub>80</sub>H<sub>128</sub>N<sub>8</sub>O<sub>20</sub>S<sub>8</sub> (%): C 54.03 %, H 7.25 %, N 6.30 %, S 14.42 %. Found (%): C 54.36 %, H 7.28 %, N 6.47 %, S 14.40 %. MS (ESI): calculated 1777.7 [M+H]<sup>+</sup>, 889.4 [M+2H]<sup>2+</sup>, found: 1777.6 [M+H]<sup>+</sup>, 889.8 [M+2H]<sup>2+</sup>.

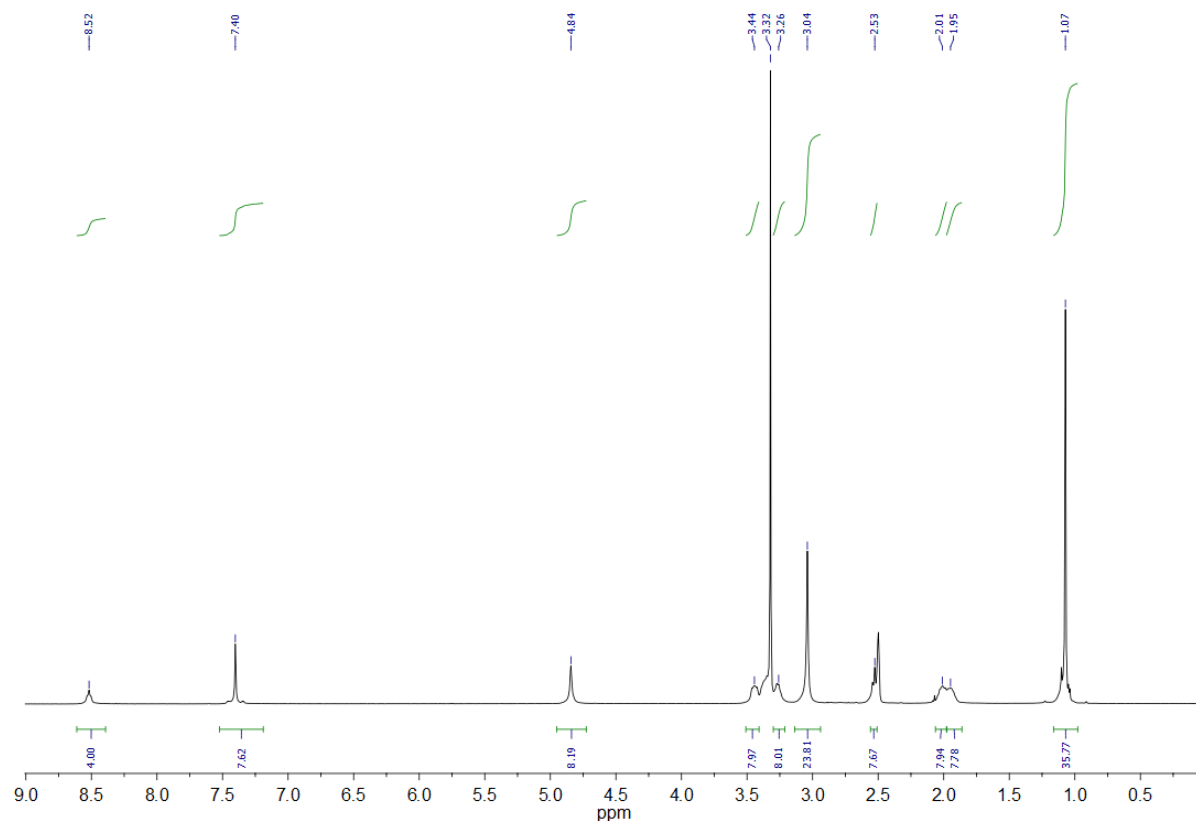

**Figure S1.** <sup>1</sup>H NMR spectrum of 5,11,17,23-tetra-*tert*-butyl-25,26,27,28-tetrakis[(N-(3',3'-dimethyl-3'-{3''-sulfonatopropyl})ammoniumpropyl)-carbamoylmethoxy]-2,8,14,20-tetrathiocalix[4]arene(*cone*) (**3**), DMSO-d<sub>6</sub>, 298 K, 400 MHz.

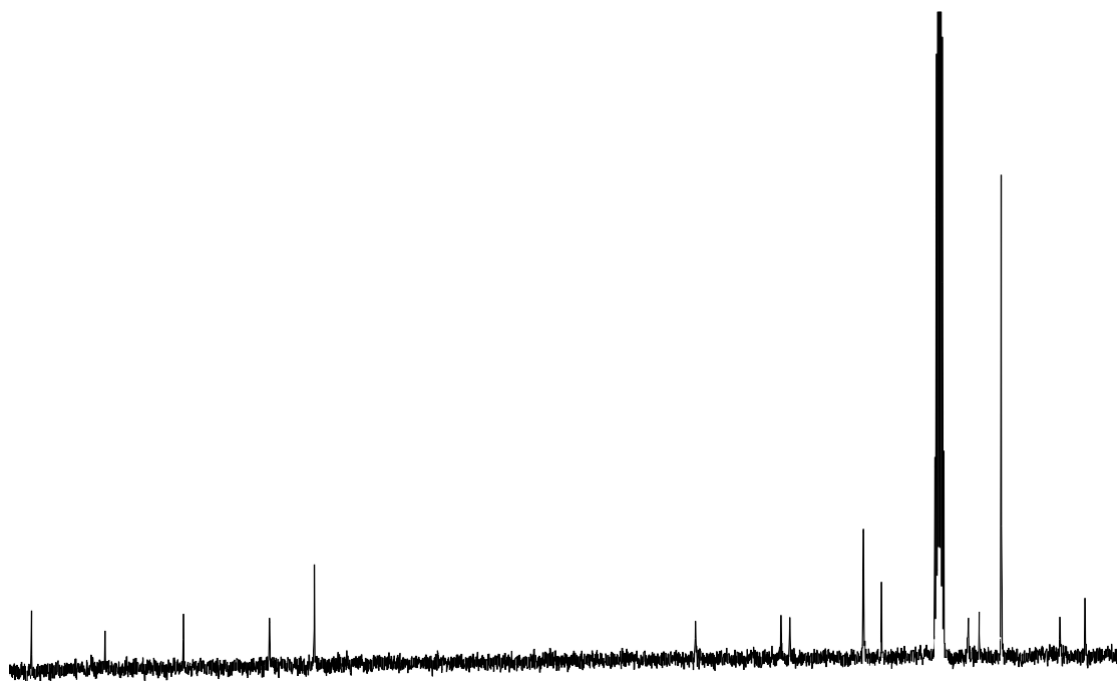

**Figure S2.** <sup>13</sup>C NMR spectrum of 5,11,17,23-tetra-*tert*-butyl-25,26,27,28-tetrakis[(N-(3',3'-dimethyl-3'-{3''-sulfonatopropyl})ammoniumpropyl)-carbamoylmethoxy]-2,8,14,20-tetrathiocalix[4]arene(*cone*) (**3**), DMSO-d<sub>6</sub>, 298 K, 400 MHz.

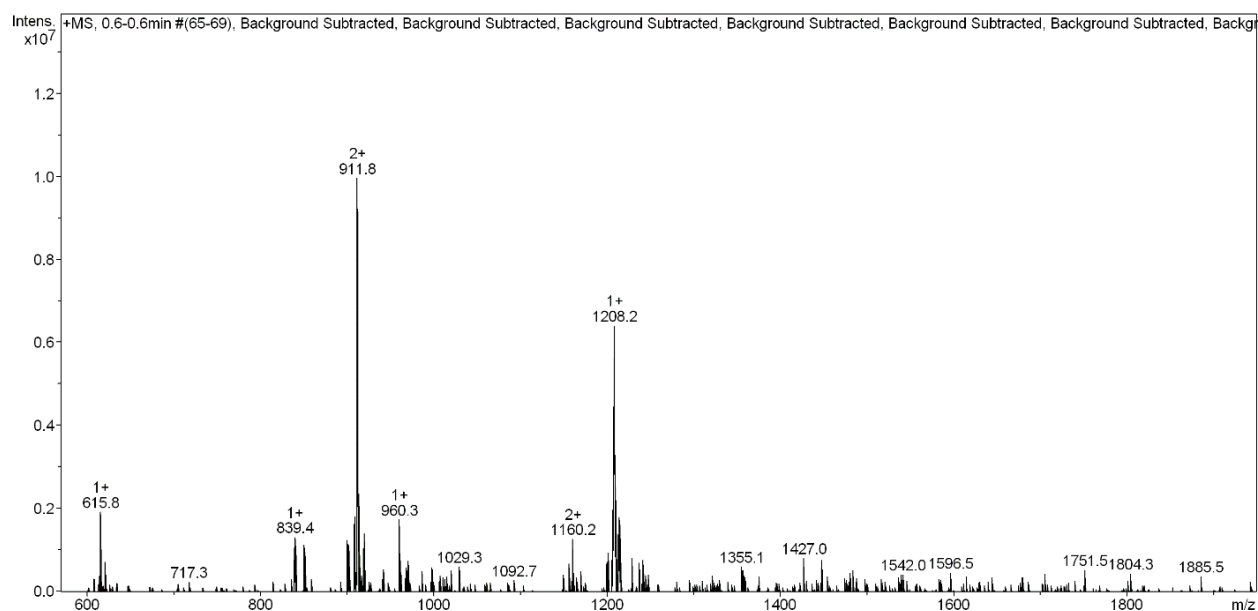

**Figure S3.** Mass spectrum (ESI) of 5,11,17,23-tetra-*tert*-butyl-25,26,27,28-tetrakis[(N-(3',3'-dimethyl-3'-{3''-sulfonatopropyl})ammoniumpropyl)-carbamoylmethoxy]-2,8,14,20-tetrathiacalix[4]arene (*cone*) (**3**).

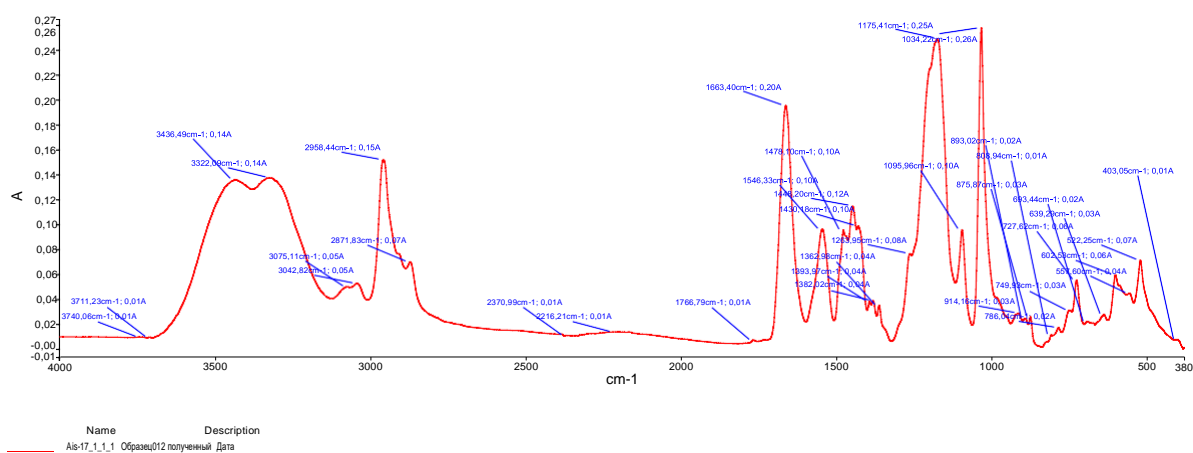

**Figure S4.** IR spectrum of 5,11,17,23-tetra-*tert*-butyl-25,26,27,28-tetrakis[(N-(3',3'-dimethyl-3'-{3''-sulfonatopropyl})ammoniumpropyl)-carbamoylmethoxy]-2,8,14,20-tetrathiacalix[4]arene (*cone*) (**3**).

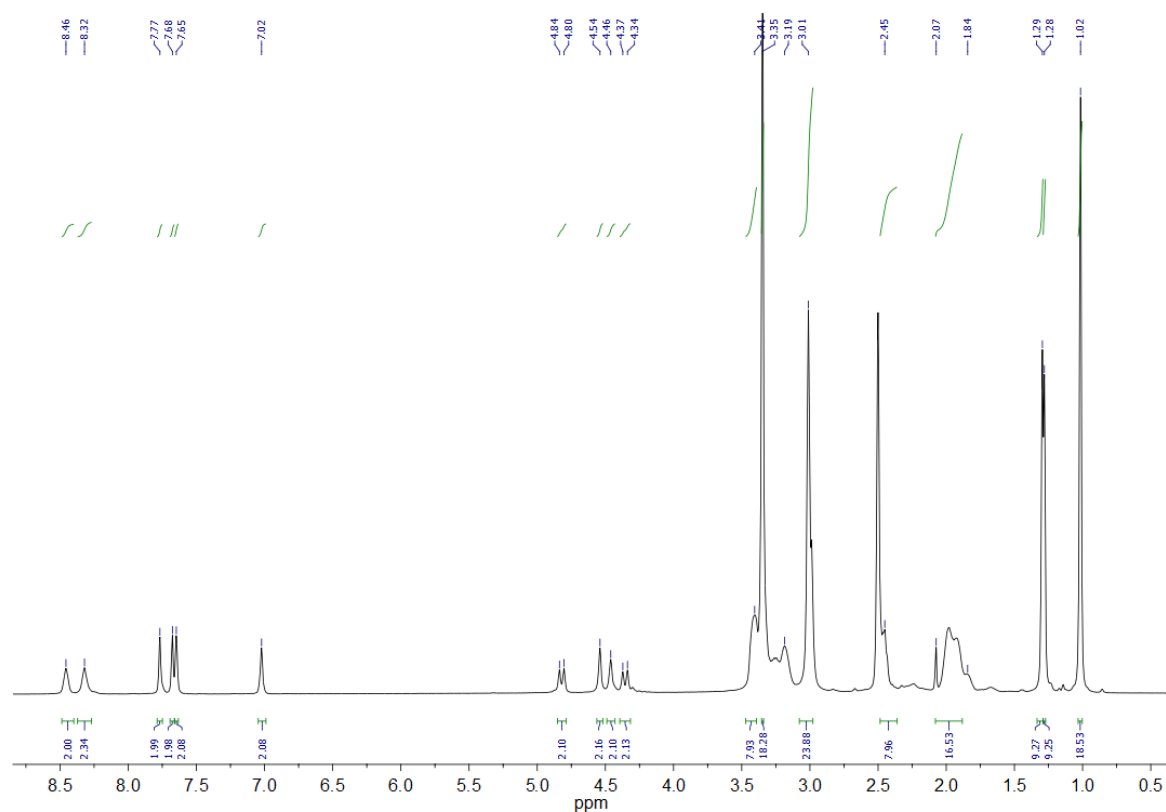

**Figure S5.** <sup>1</sup>H NMR spectrum of 5,11,17,23-tetra-*tert*-butyl-25,26,27,28-tetrakis[(N-(3',3'-dimethyl-3'-{3''-sulfonatopropyl})ammoniumpropyl)-carbamoylmethoxy]-2,8,14,20-tetrathiacalix[4]arene(*partial cone*) (**4**), DMSO-d<sub>6</sub>, 298 K, 400 MHz.

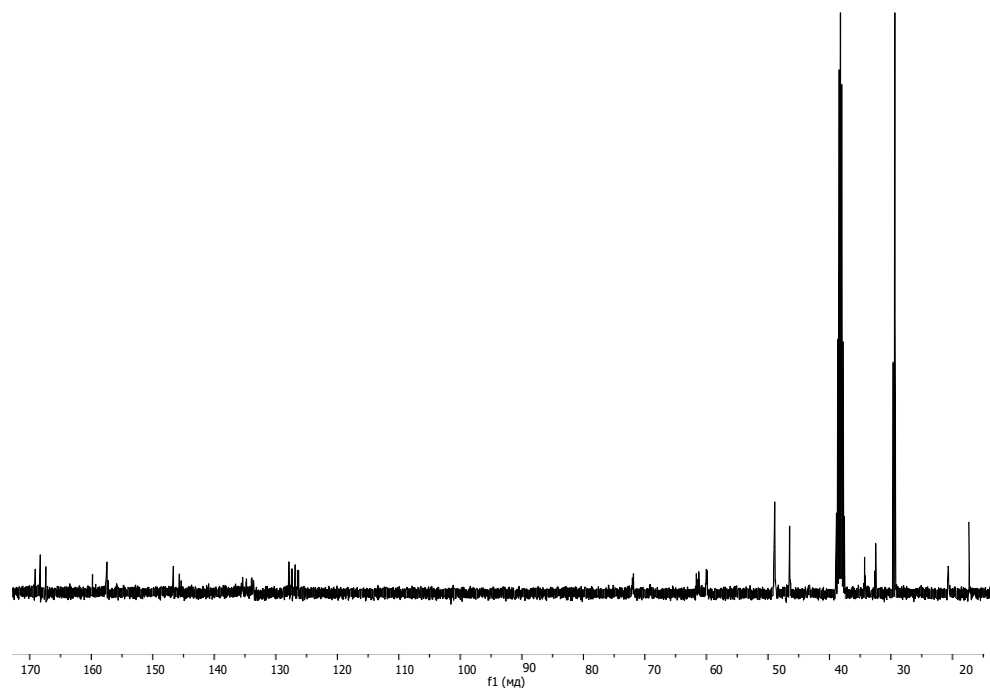

**Figure S6.** <sup>13</sup>C NMR spectrum of 5,11,17,23-tetra-*tert*-butyl-25,26,27,28-tetrakis[(N-(3',3'-dimethyl-3'-{3''-sulfonatopropyl})ammoniumpropyl)-carbamoylmethoxy]-2,8,14,20-tetrathiacalix[4]arene(*partial cone*) (**4**), DMSO-d<sub>6</sub>, 298 K, 400 MHz.

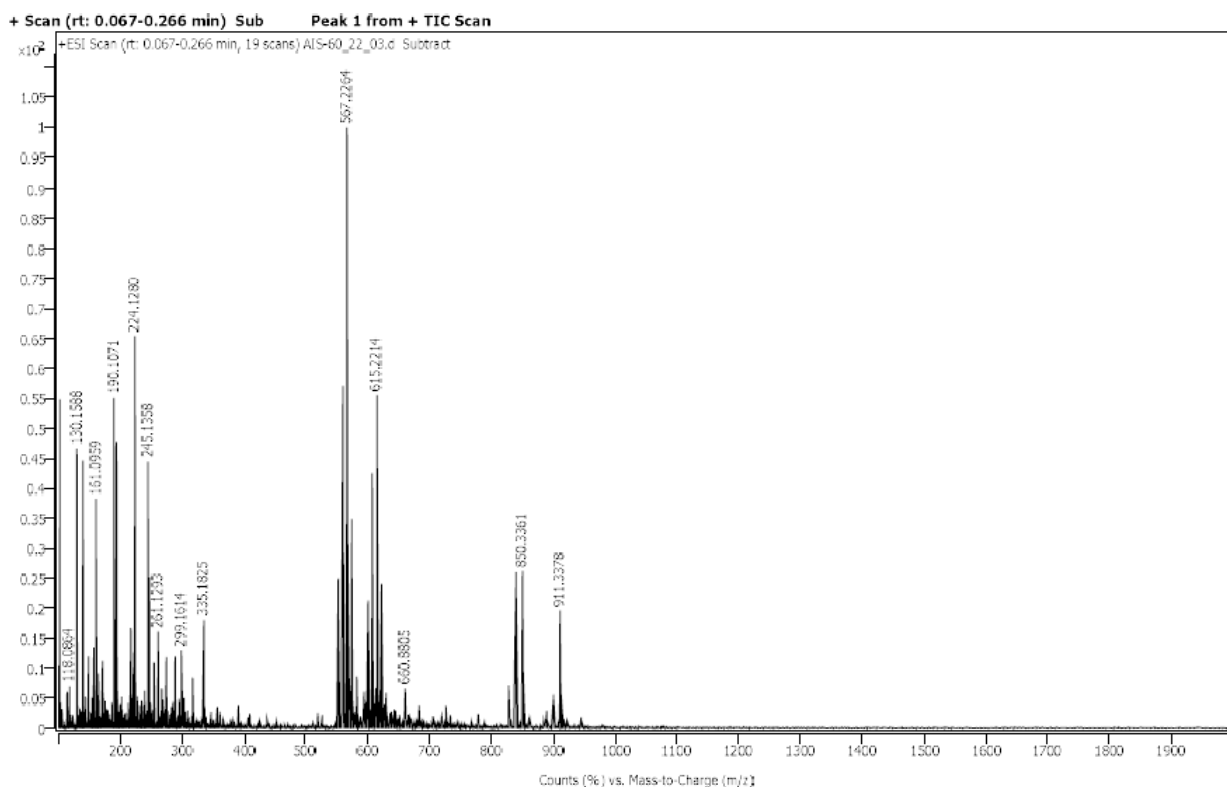

**Figure S7.** Mass spectrum (ESI) of 5,11,17,23-tetra-*tert*-butyl-25,26,27,28-tetrakis[(N-(3',3'-dimethyl-3'-{3''-sulfonatopropyl})ammoniumpropyl)-carbamoylmethoxy]-2,8,14,20-tetrathiactalix[4]arene (*partial cone*) (**4**).

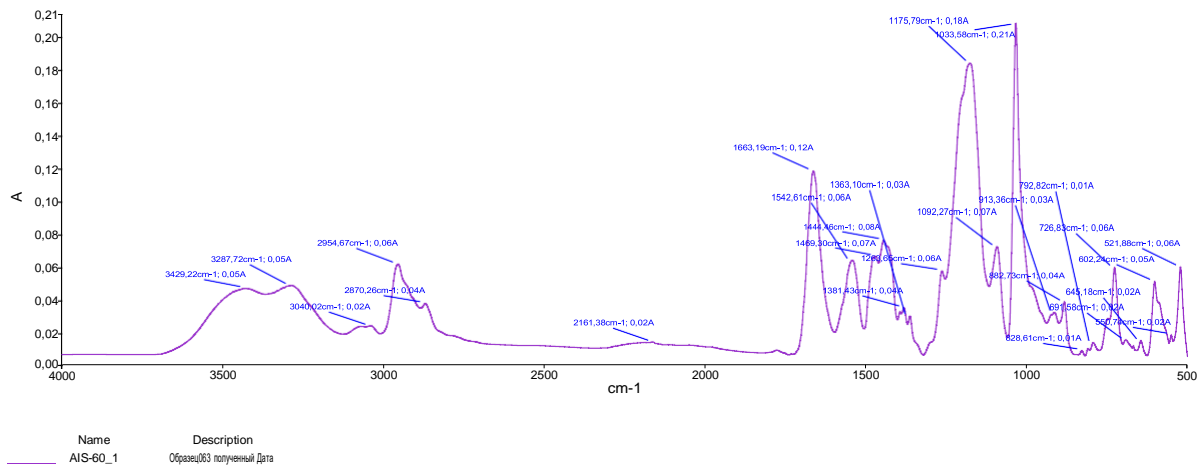

**Figure S8.** IR spectrum of 5,11,17,23-tetra-*tert*-butyl-25,26,27,28-tetrakis[(N-(3',3'-dimethyl-3'-{3''-sulfonatopropyl})ammoniumpropyl)-carbamoylmethoxy]-2,8,14,20-tetrathiactalix[4]arene (*partial cone*) (**4**).

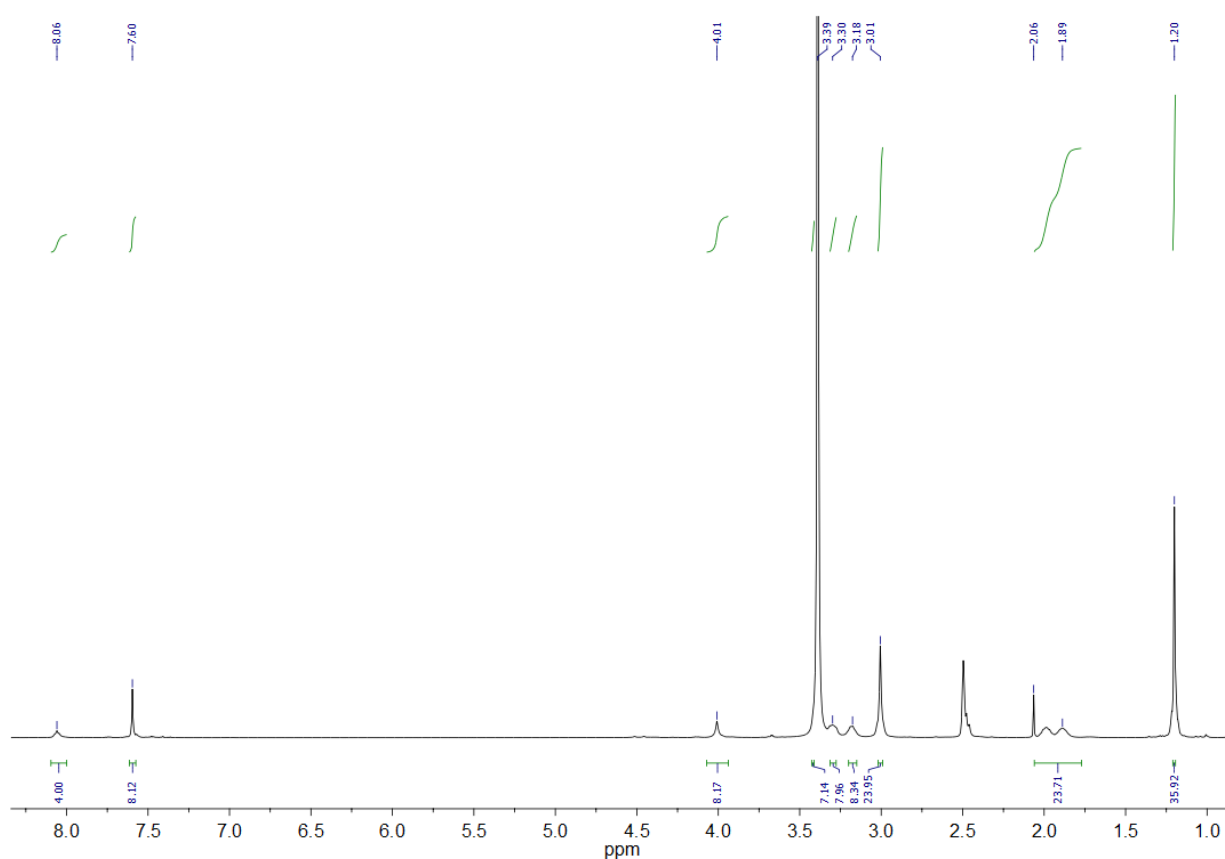

**Figure S9.**  $^1\text{H}$  NMR spectrum of 5,11,17,23-tetra-*tert*-butyl-25,26,27,28-tetrakis[(N-(3',3'-dimethyl-3'-{3''-sulfonatopropyl})ammoniumpropyl)-carbamoylmethoxy]-2,8,14,20-tetrathiocalix[4]arene(1,3-*alternate*) (**5**), DMSO- $\text{d}_6$ , 298 K, 400 MHz.

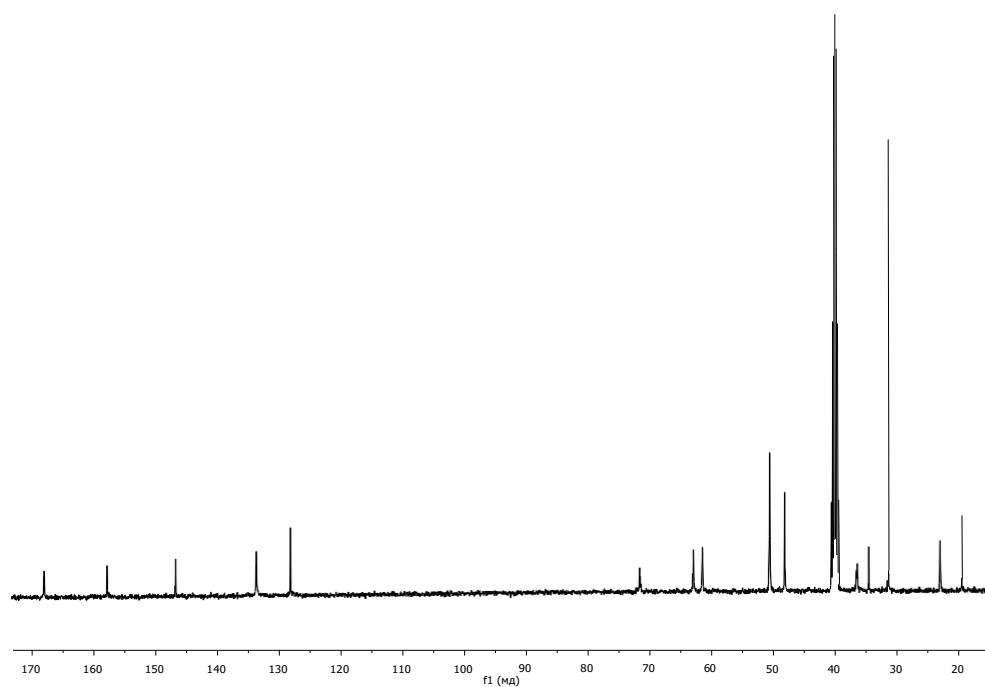

**Figure S10.**  $^{13}\text{C}$  NMR spectrum of 5,11,17,23-tetra-*tert*-butyl-25,26,27,28-tetrakis[(N-(3',3'-dimethyl-3'-{3''-sulfonatopropyl})ammoniumpropyl)-carbamoylmethoxy]-2,8,14,20-tetrathiocalix[4]arene (1,3-*alternate*) (**5**), DMSO- $\text{d}_6$ , 298 K, 400 MHz.

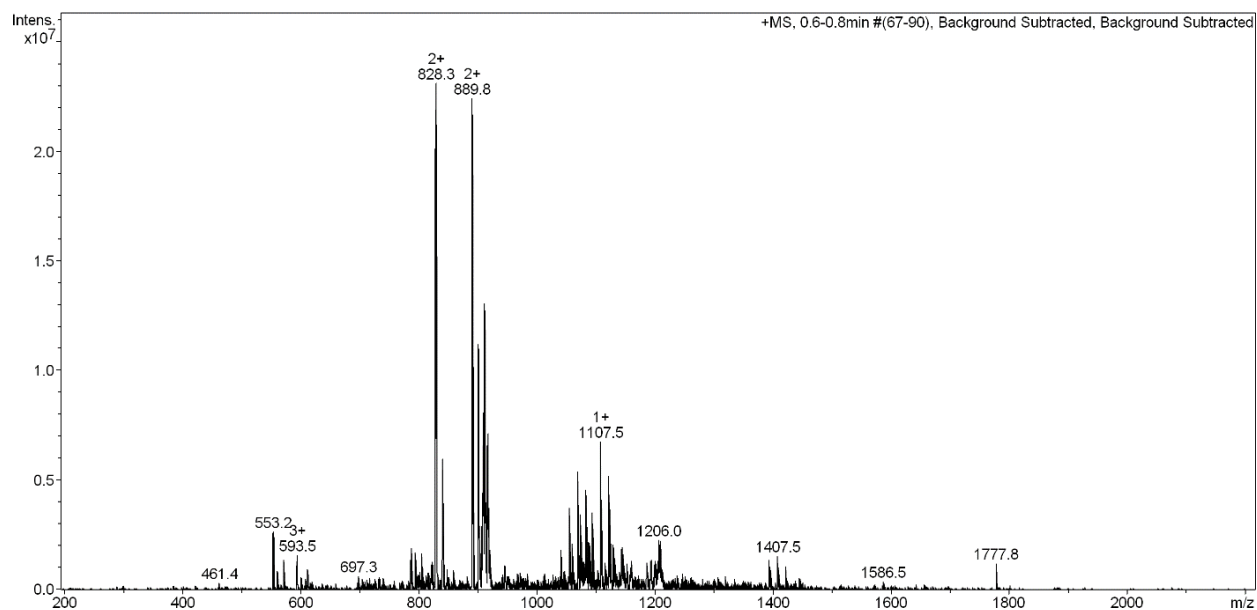

**Figure S11.** Mass spectrum (ESI) of 5,11,17,23-tetra-*tert*-butyl-25,26,27,28-tetrakis[(N-(3',3'-dimethyl-3'-{3''-sulfonatopropyl})ammoniumpropyl)-carbamoylmethoxy]-2,8,14,20-tetrathiocalix[4]arene (1,3-*alternate*) (**5**).

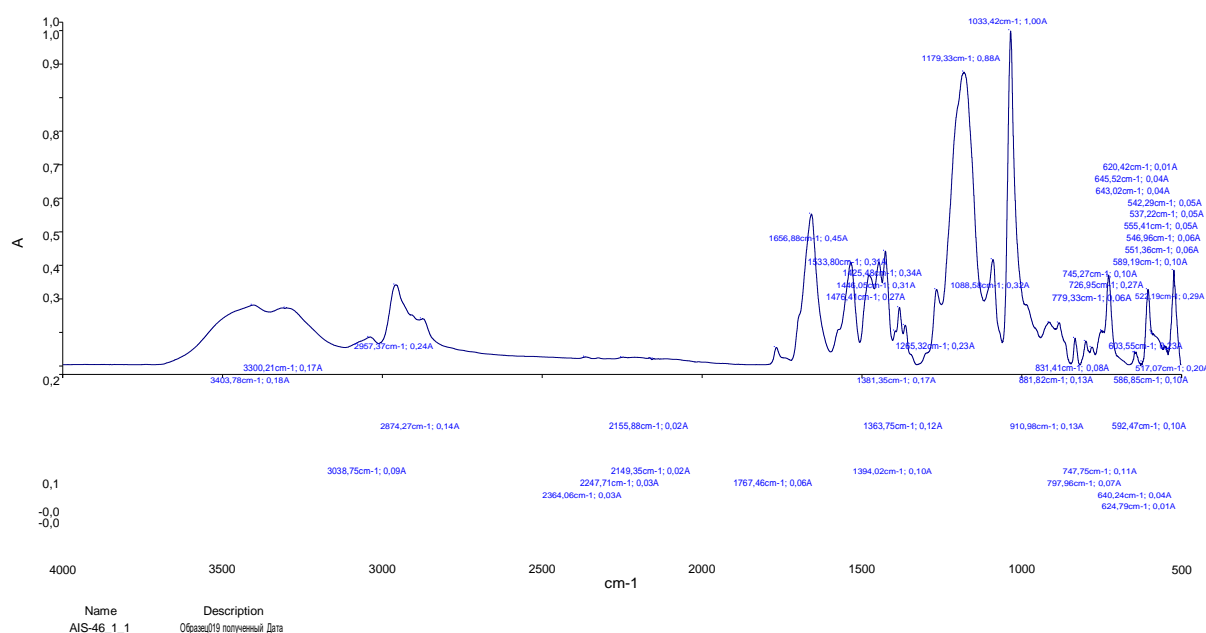

**Figure S12.** IR spectrum of 5,11,17,23-tetra-*tert*-butyl-25,26,27,28-tetrakis[(N-(3',3'-dimethyl-3'-{3''-sulfonatopropyl})ammoniumpropyl)-carbamoylmethoxy]-2,8,14,20-tetrathiocalix[4]arene (1,3-*alternate*) (**5**).



## 2. Dynamic light scattering

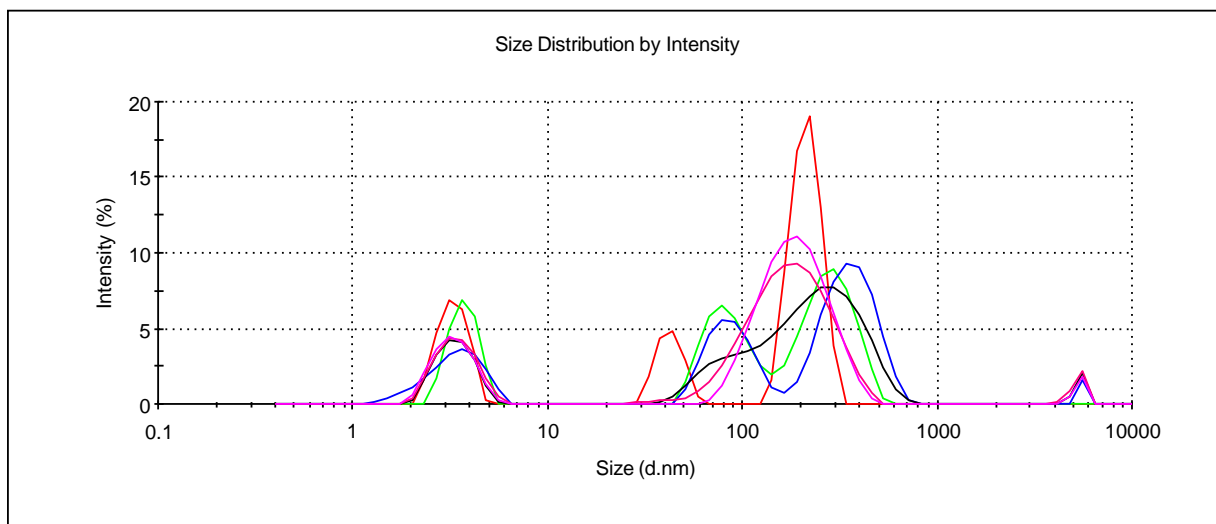

**Figure. S13.** Size distribution of 5,11,17,23-tetra-*tert*-butyl-25,26,27,28-tetrakis[(N-(3',3'-dimethyl-3'-{3''-sulfonatopropyl})ammoniumpropyl)-carbamoylmethoxy]-2,8,14,20-tetrathiocalix[4]arene(*cone*) (**3**) in water ( $3 \times 10^{-4}$  M).

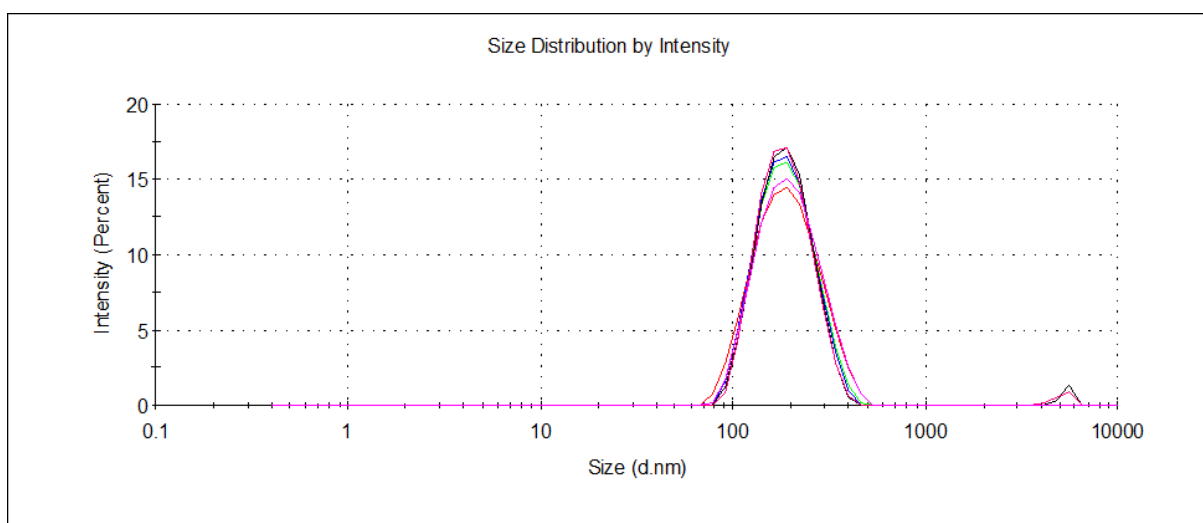

**Figure S14.** Size distribution of 5,11,17,23-tetra-*tert*-butyl-25,26,27,28-tetrakis[(N-(3',3'-dimethyl-3'-{3''-sulfonatopropyl})ammoniumpropyl)-carbamoylmethoxy]-2,8,14,20-tetrathiocalix[4]arene(*cone*) (**3**) in the presence of  $\text{Ag}^{\text{I}}$  in water ( $3 \times 10^{-4}$  M), (1:1).

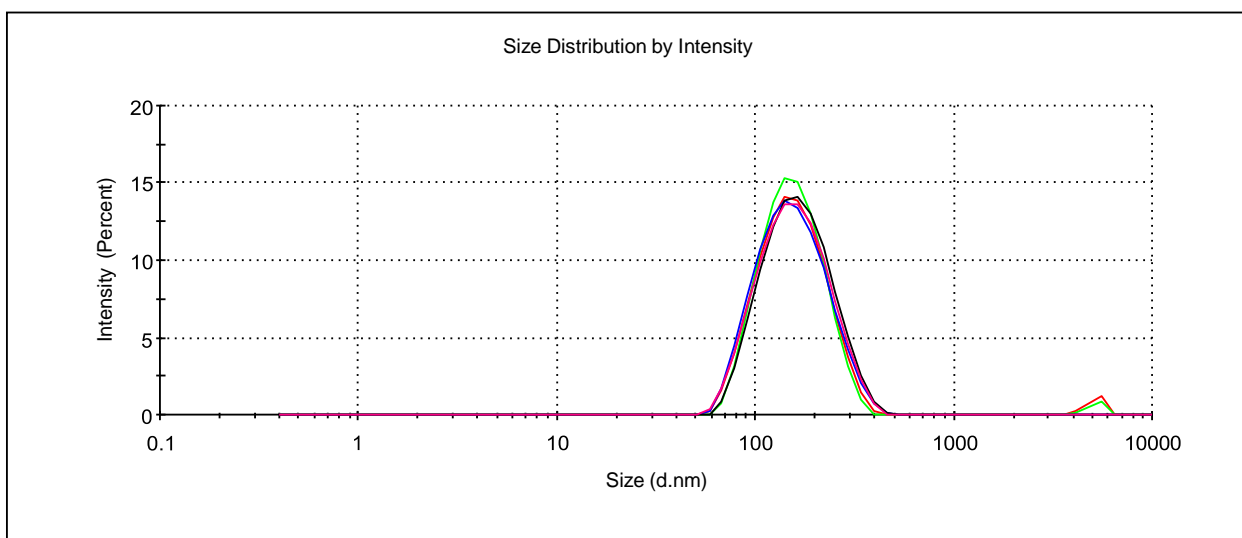

**Figure S15.** Size distribution of 5,11,17,23-tetra-*tert*-butyl-25,26,27,28-tetrakis[(N-(3',3'-dimethyl-3'-{3''-sulfonatopropyl})ammoniumpropyl)-carbamoylmethoxy]-2,8,14,20-tetrathiocalix[4]arene(*cone*) (**3**) in the presence of Ag<sup>I</sup> in water ( $1 \times 10^{-4}$  M), (1:1).

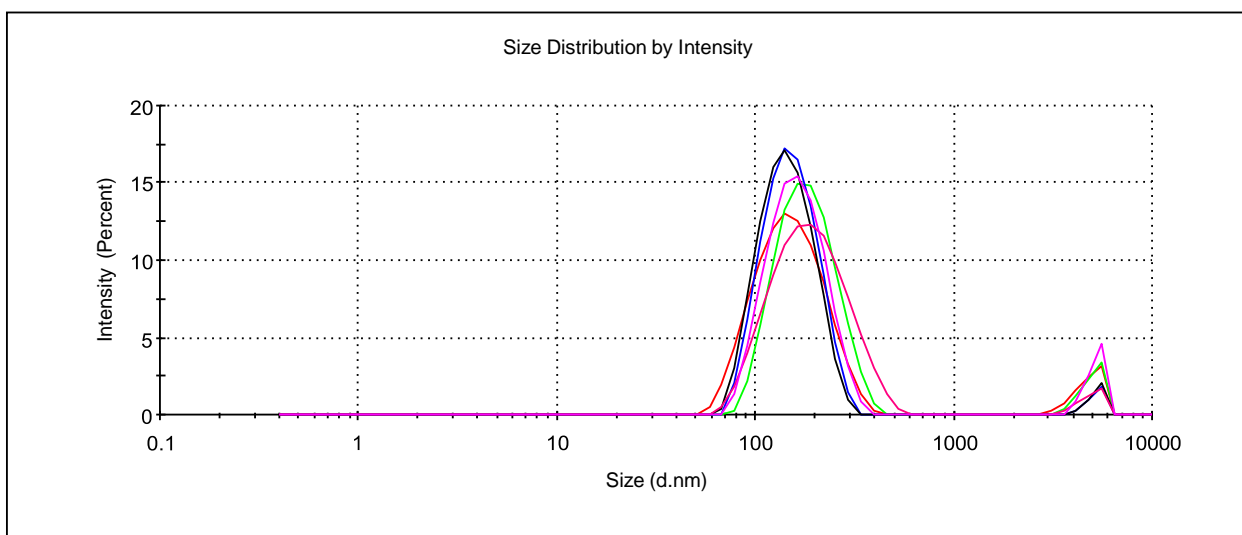

**Figure S16.** Size distribution of 5,11,17,23-tetra-*tert*-butyl-25,26,27,28-tetrakis[(N-(3',3'-dimethyl-3'-{3''-sulfonatopropyl})ammoniumpropyl)-carbamoylmethoxy]-2,8,14,20-tetrathiocalix[4]arene(*cone*) (**3**) in the presence of Ag<sup>I</sup> in water ( $1 \times 10^{-5}$  M), (1:1).

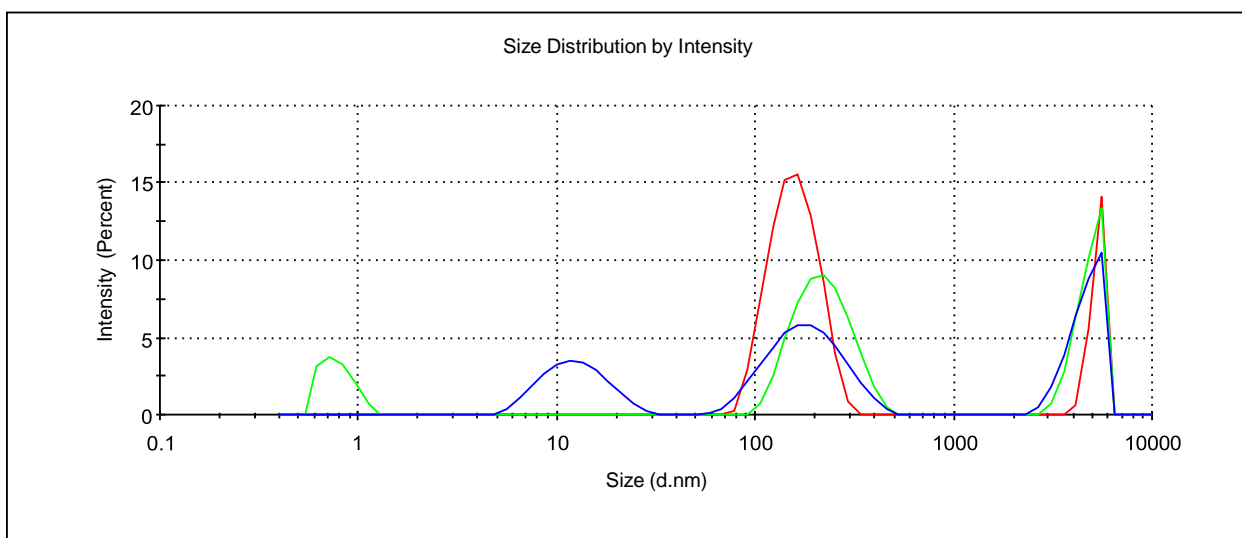

**Figure S17.** Size distribution of 5,11,17,23-tetra-*tert*-butyl-25,26,27,28-tetrakis[(N-(3',3'-dimethyl-3'-{3''-sulfonatopropyl})ammoniumpropyl)-carbamoylmethoxy]-2,8,14,20-tetrathiocalix[4]arene(*cone*) (**3**) in the presence of Ag<sup>I</sup> in water ( $1 \times 10^{-6}$  M), (1:1).

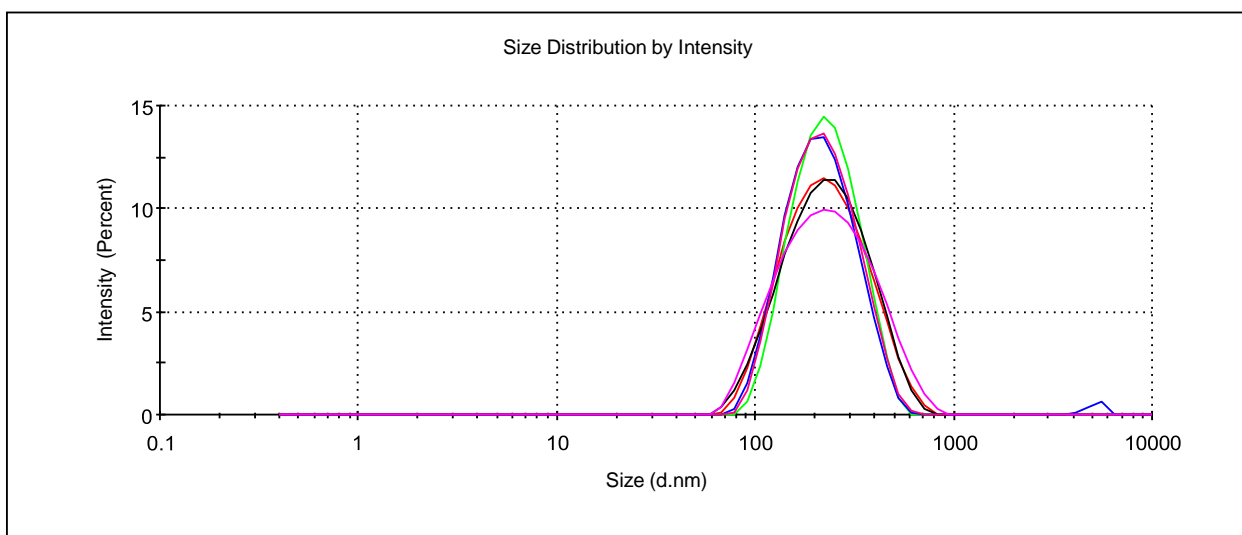

**Figure S18.** Size distribution of 5,11,17,23-tetra-*tert*-butyl-25,26,27,28-tetrakis[(N-(3',3'-dimethyl-3'-{3''-sulfonatopropyl})ammoniumpropyl)-carbamoylmethoxy]-2,8,14,20-tetrathiocalix[4]arene(*cone*) (**3**) in the presence of Ag<sup>I</sup> in water ( $1 \times 10^{-4}$  M), (1:4).

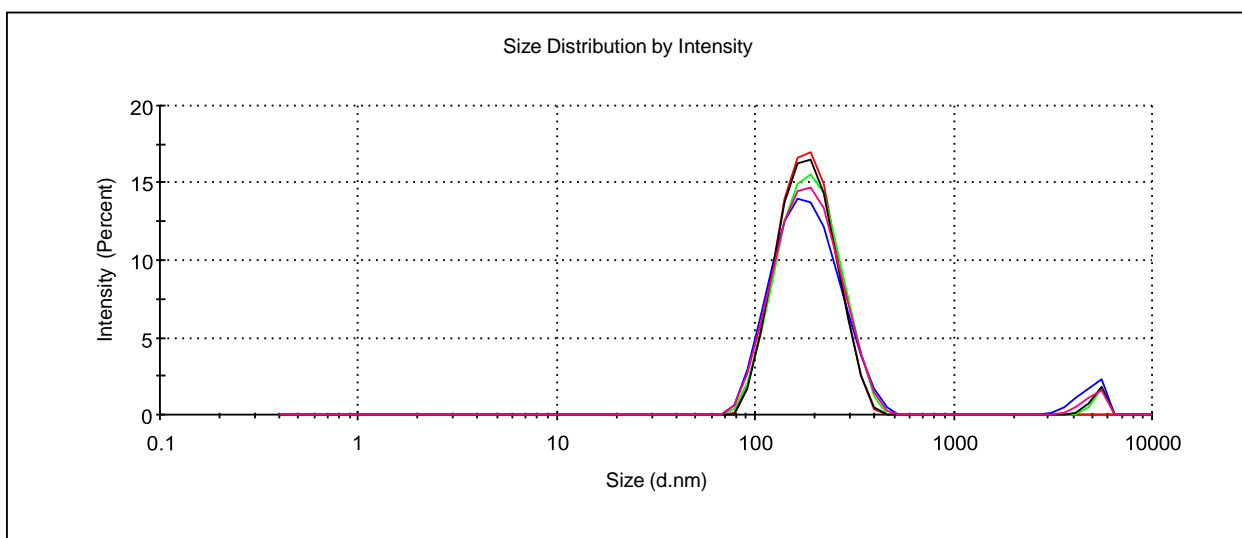

**Figure S19.** Size distribution of 5,11,17,23-tetra-*tert*-butyl-25,26,27,28-tetrakis[(N-(3',3'-dimethyl-3'-{3''-sulfonatopropyl}))ammoniumpropyl)-carbamoylmethoxy]-2,8,14,20-tetrathiocalix[4]arene(*cone*) (**3**) in the presence of Ag<sup>I</sup> in water ( $1 \times 10^{-5}$  M), (1:4).

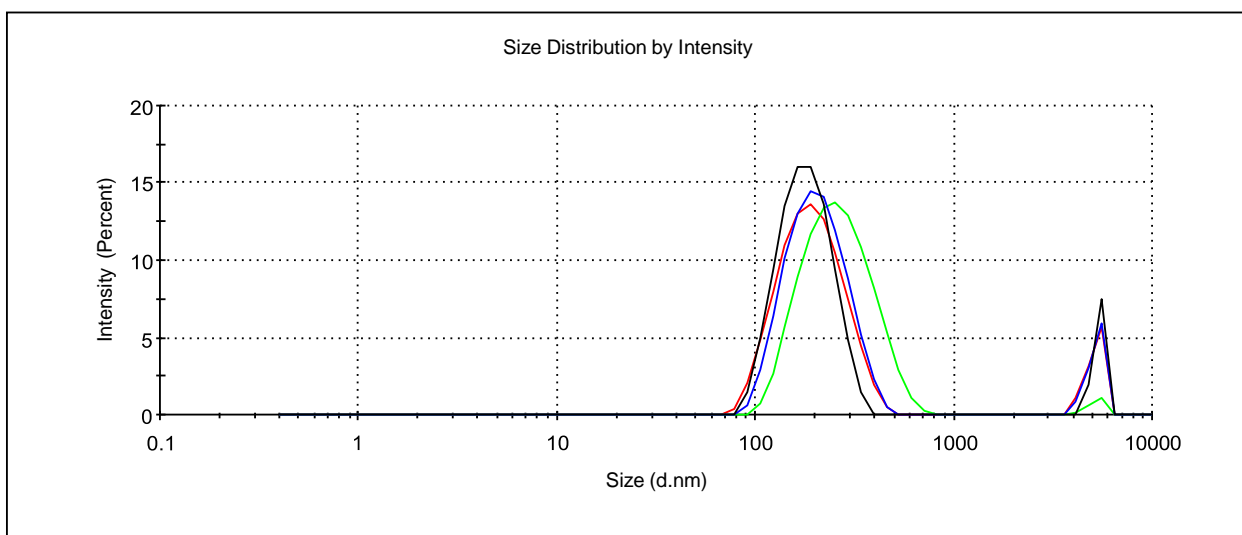

**Figure S20.** Size distribution of 5,11,17,23-tetra-*tert*-butyl-25,26,27,28-tetrakis[(N-(3',3'-dimethyl-3'-{3''-sulfonatopropyl}))ammoniumpropyl)-carbamoylmethoxy]-2,8,14,20-tetrathiocalix[4]arene(*cone*) (**3**) in the presence of Ag<sup>I</sup> in water ( $1 \times 10^{-6}$  M), (1:4).

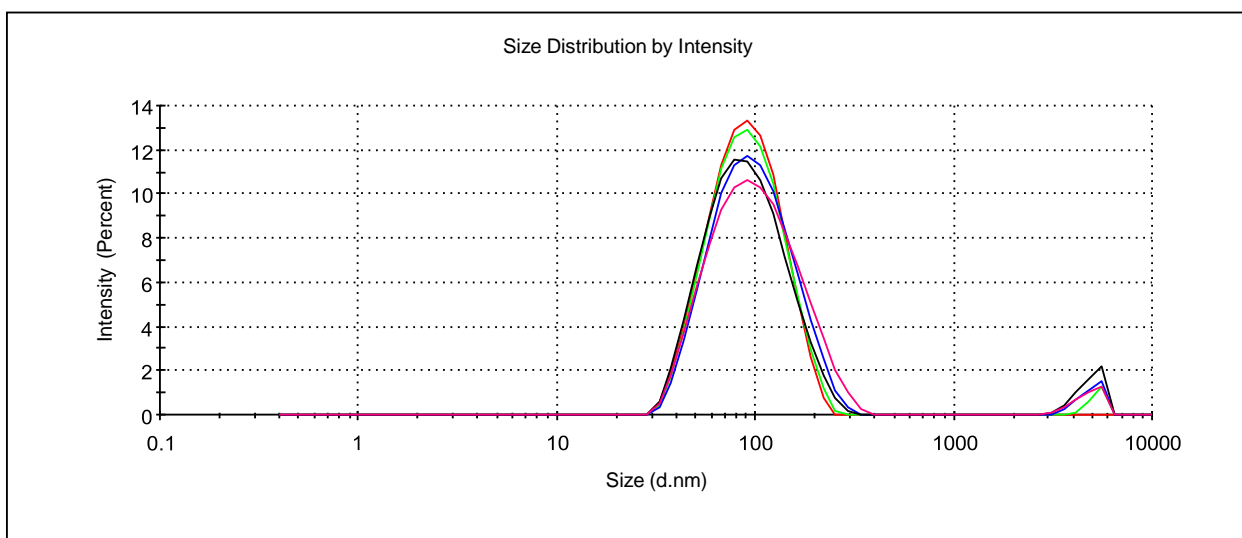

**Figure S21.** Size distribution of 5,11,17,23-tetra-*tert*-butyl-25,26,27,28-tetrakis[(N-(3',3'-dimethyl-3'-{3''-sulfonatopropyl})ammoniumpropyl)-carbamoylmethoxy]-2,8,14,20-tetrathiocalix[4]arene(*cone*) (**3**) in the presence of Ag<sup>I</sup> in water ( $1 \times 10^{-4}$  M), (1:10).

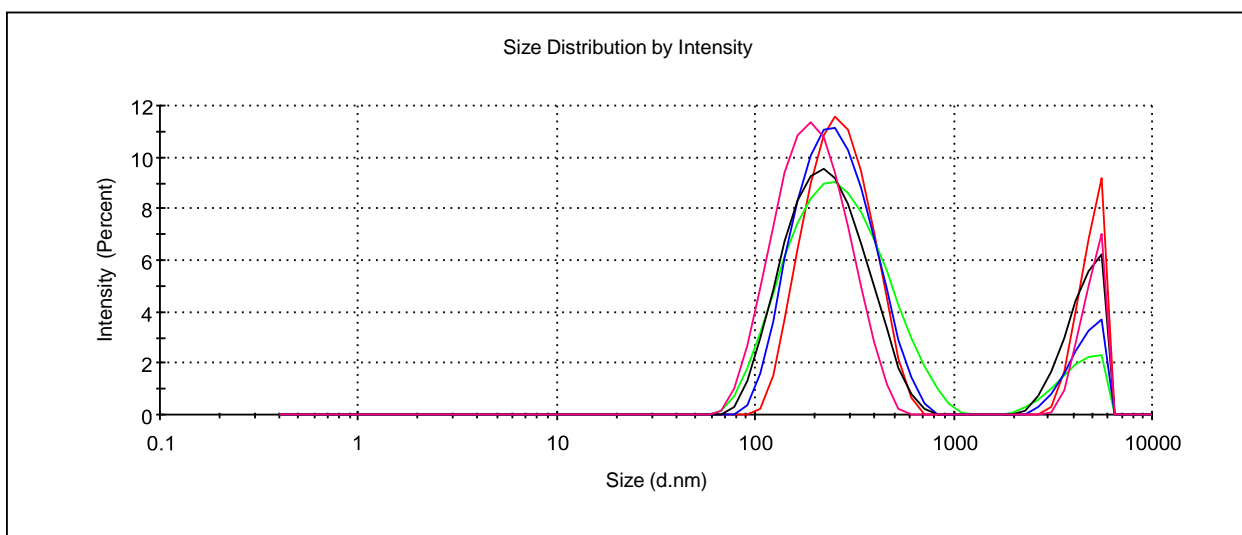

**Figure S22.** Size distribution of 5,11,17,23-tetra-*tert*-butyl-25,26,27,28-tetrakis[(N-(3',3'-dimethyl-3'-{3''-sulfonatopropyl})ammoniumpropyl)-carbamoylmethoxy]-2,8,14,20-tetrathiocalix[4]arene(*cone*) (**3**) in the presence of Ag<sup>I</sup> in water ( $1 \times 10^{-5}$  M), (1:10).

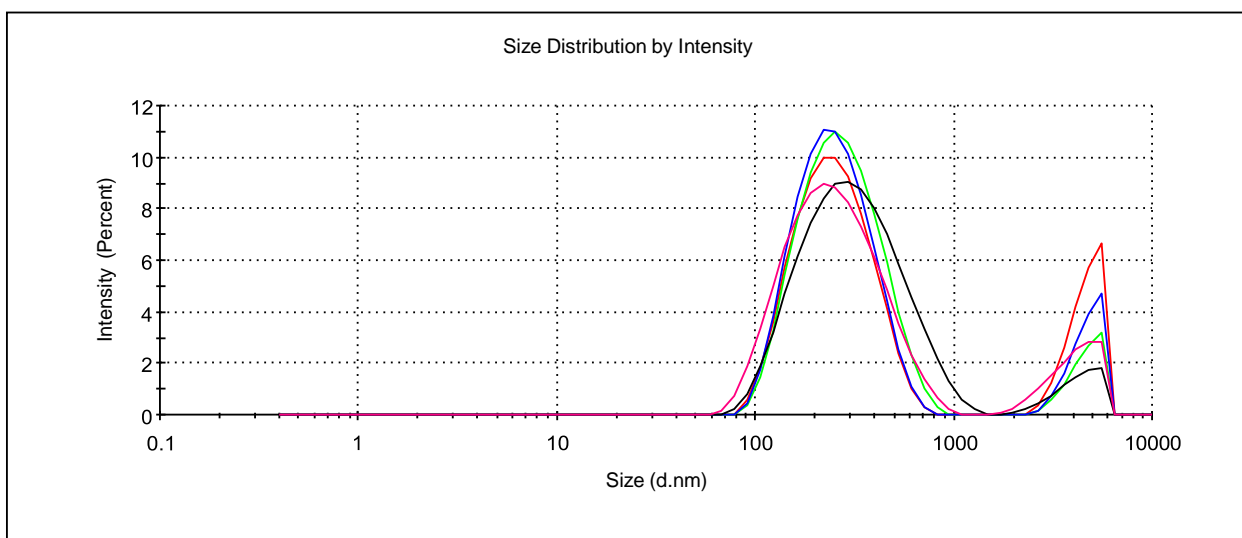

**Figure S23.** Size distribution of 5,11,17,23-tetra-*tert*-butyl-25,26,27,28-tetrakis[(N-(3',3'-dimethyl-3'-{3''-sulfonatopropyl})ammoniumpropyl)-carbamoylmethoxy]-2,8,14,20-tetrathiocalix[4]arene(*cone*) (**3**) in the presence of Ag<sup>I</sup> in water ( $1 \times 10^{-6}$  M), (1:10).

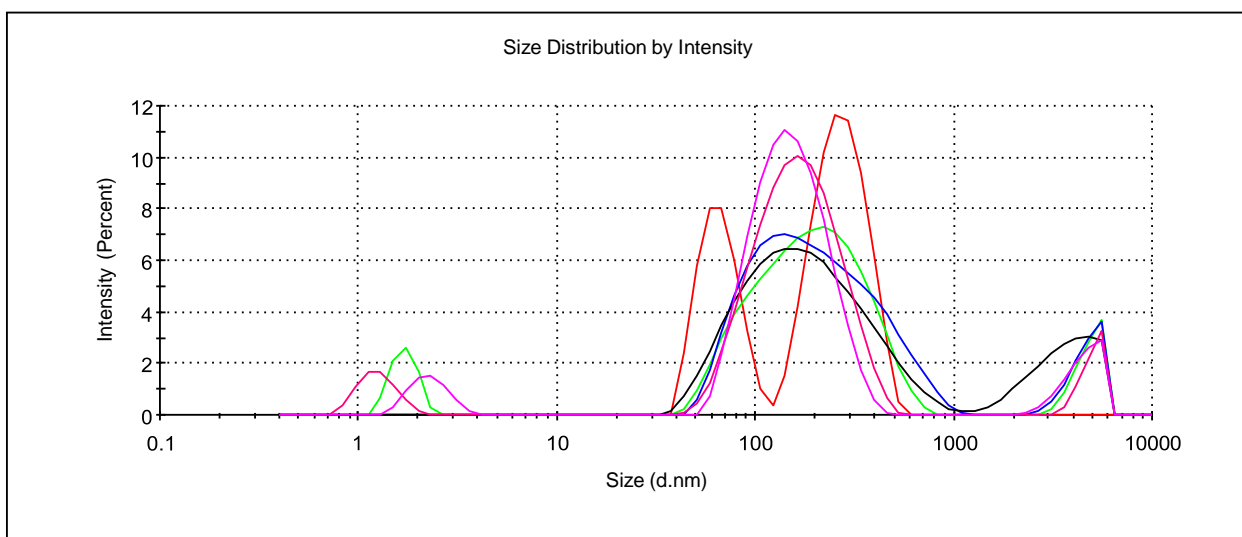

**Figure S24.** Size distribution of 5,11,17,23-tetra-*tert*-butyl-25,26,27,28-tetrakis[(N-(3',3'-dimethyl-3'-{3''-sulfonatopropyl})ammoniumpropyl)-carbamoylmethoxy]-2,8,14,20-tetrathiocalix[4]arene(*partial cone*) (**4**) in water ( $1 \times 10^{-4}$  M).

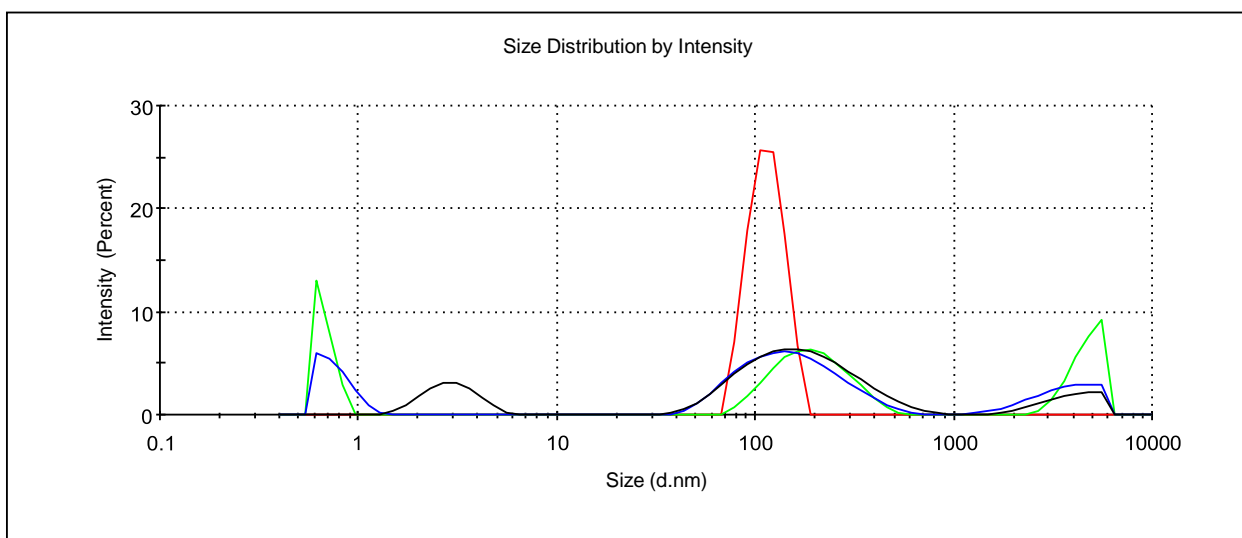

**Figure S25.** Size distribution of 5,11,17,23-tetra-*tert*-butyl-25,26,27,28-tetrakis[(N-(3',3'-dimethyl-3'-{3''-sulfonatopropyl})ammoniumpropyl)-carbamoylmethoxy]-2,8,14,20-tetrathiocalix[4]arene(*partial cone*) (**4**) in water ( $1 \times 10^{-5}$  M).

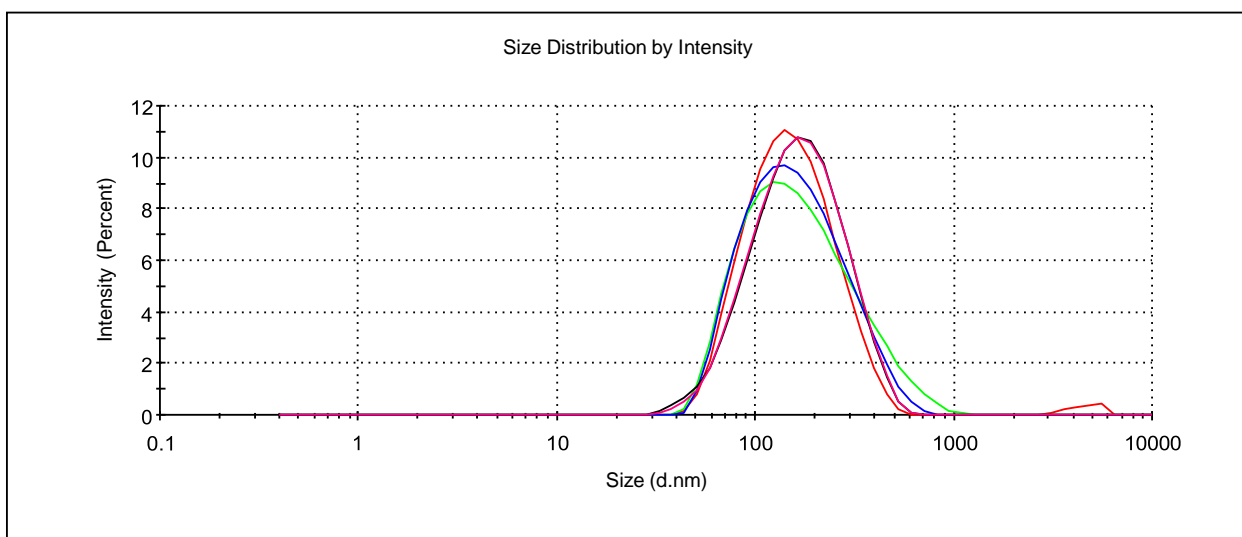

**Figure S26.** Size distribution of 5,11,17,23-tetra-*tert*-butyl-25,26,27,28-tetrakis[(N-(3',3'-dimethyl-3'-{3''-sulfonatopropyl})ammoniumpropyl)-carbamoylmethoxy]-2,8,14,20-tetrathiocalix[4]arene(*partial cone*) (**4**) in the presence of  $\text{Ag}^{\text{I}}$  in water ( $1 \times 10^{-4}$  M), (1:1).

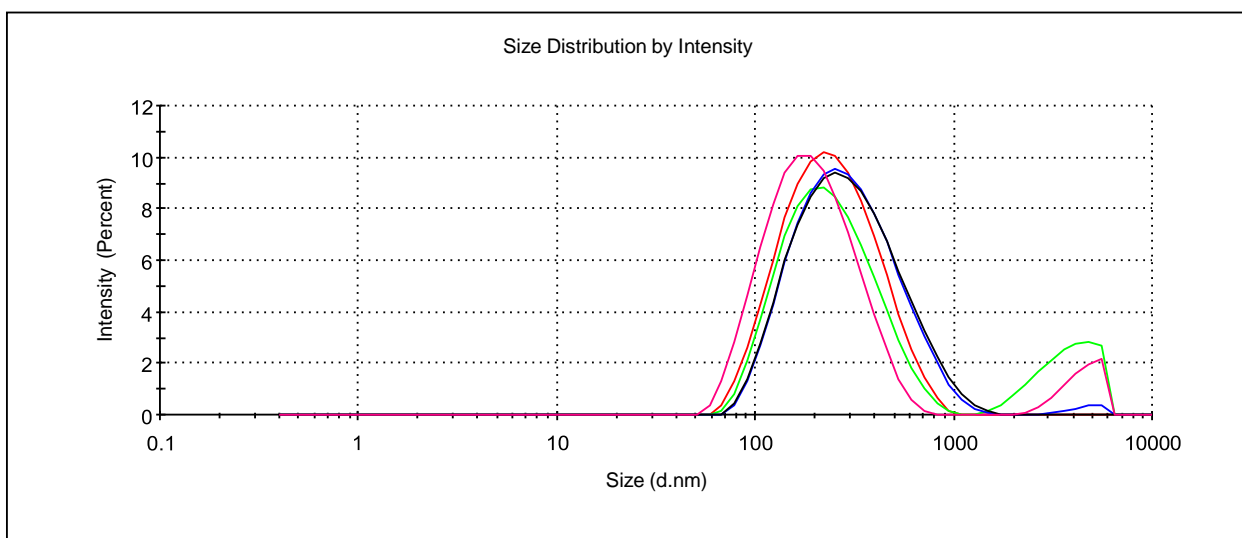

**Figure S27.** Size distribution of 5,11,17,23-tetra-*tert*-butyl-25,26,27,28-tetrakis[(N-(3',3'-dimethyl-3'-{3''-sulfonatopropyl})ammoniumpropyl)-carbamoylmethoxy]-2,8,14,20-tetrathiocalix[4]arene(*partial cone*) (**4**) in the presence of Ag<sup>I</sup> in water ( $1 \times 10^{-5}$  M), (1:1).

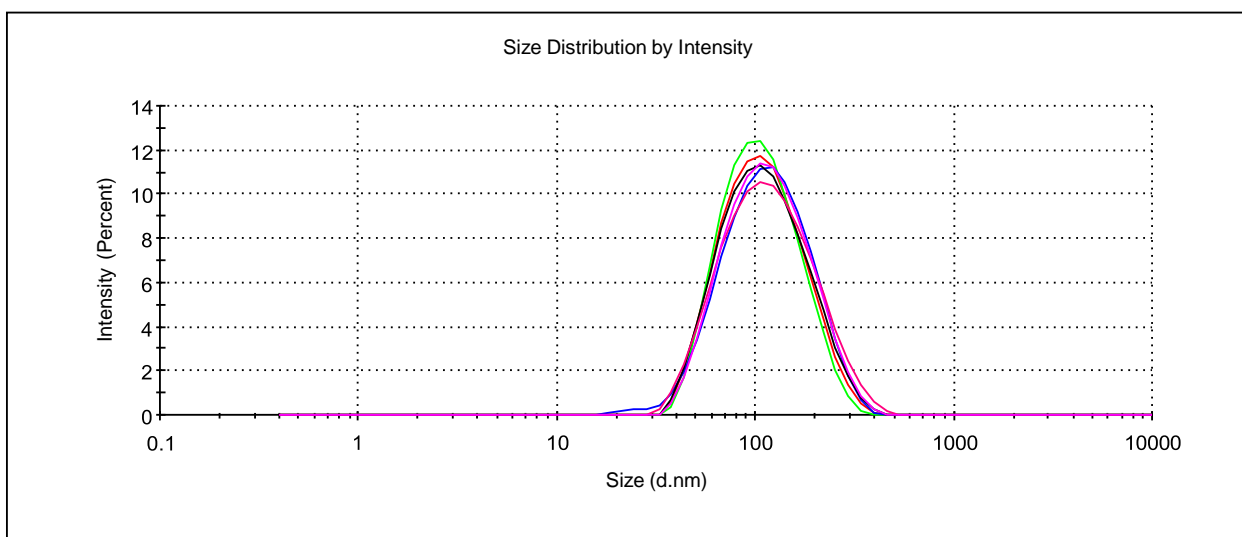

**Figure S28.** Size distribution of 5,11,17,23-tetra-*tert*-butyl-25,26,27,28-tetrakis[(N-(3',3'-dimethyl-3'-{3''-sulfonatopropyl})ammoniumpropyl)-carbamoylmethoxy]-2,8,14,20-tetrathiocalix[4]arene(*partial cone*) (**4**) in the presence of Ag<sup>I</sup> in water ( $1 \times 10^{-4}$  M), (1:4).



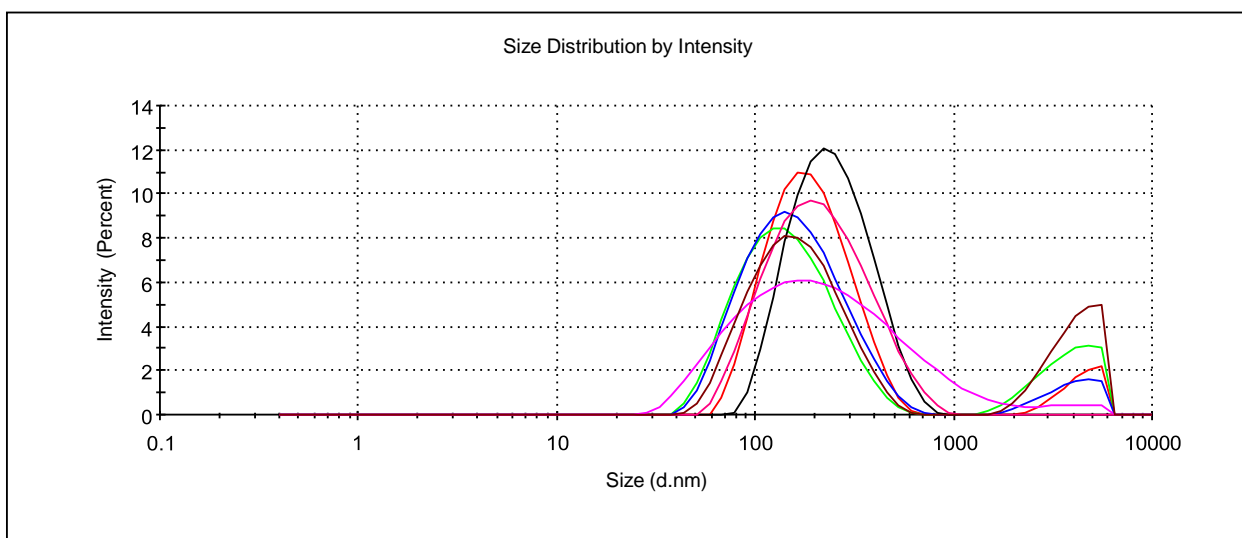

**Figure S29.** Size distribution of 5,11,17,23-tetra-*tert*-butyl-25,26,27,28-tetrakis[(N-(3',3'-dimethyl-3'-{3''-sulfonatopropyl})ammoniumpropyl)-carbamoylmethoxy]-2,8,14,20-tetrathiocalix[4]arene(*partial cone*) (**4**) in the presence of Ag<sup>I</sup> in water ( $1 \times 10^{-5}$  M), (1:4).

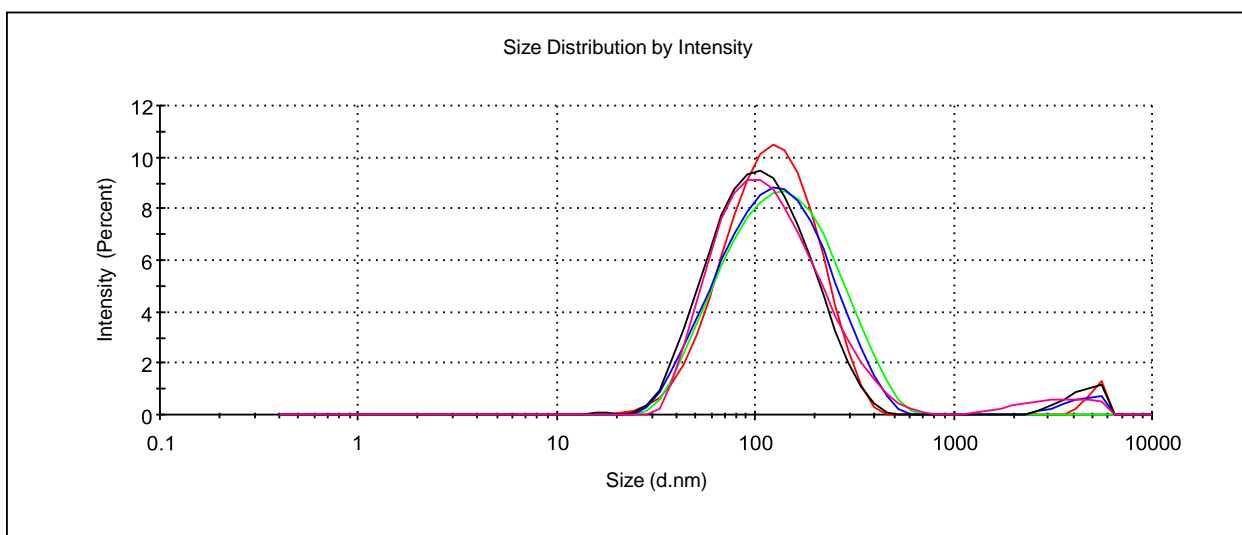

**Figure S30.** Size distribution of 5,11,17,23-tetra-*tert*-butyl-25,26,27,28-tetrakis[(N-(3',3'-dimethyl-3'-{3''-sulfonatopropyl})ammoniumpropyl)-carbamoylmethoxy]-2,8,14,20-tetrathiocalix[4]arene(*partial cone*) (**4**) in the presence of Ag<sup>I</sup> in water ( $1 \times 10^{-4}$  M), (1:10).

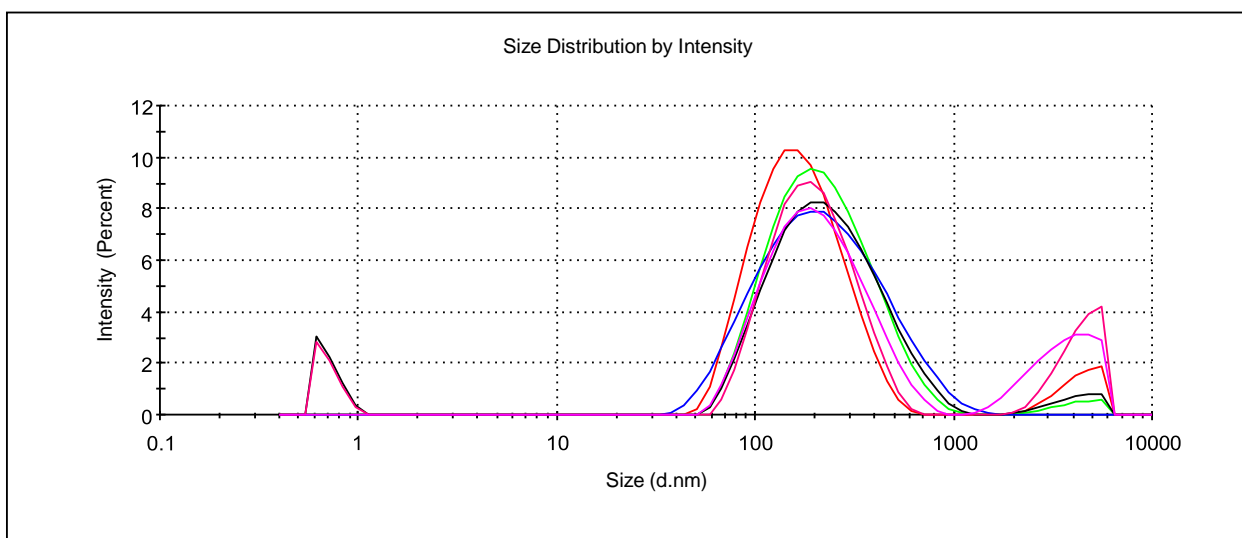

**Figure S31.** Size distribution of 5,11,17,23-tetra-*tert*-butyl-25,26,27,28-tetrakis[(N-(3',3'-dimethyl-3'-{3''-sulfonatopropyl})ammoniumpropyl)-carbamoylmethoxy]-2,8,14,20-tetrathiocalix[4]arene(*partial cone*) (**4**) in the presence of Ag<sup>I</sup> in water ( $1 \times 10^{-5}$  M), (1:10).

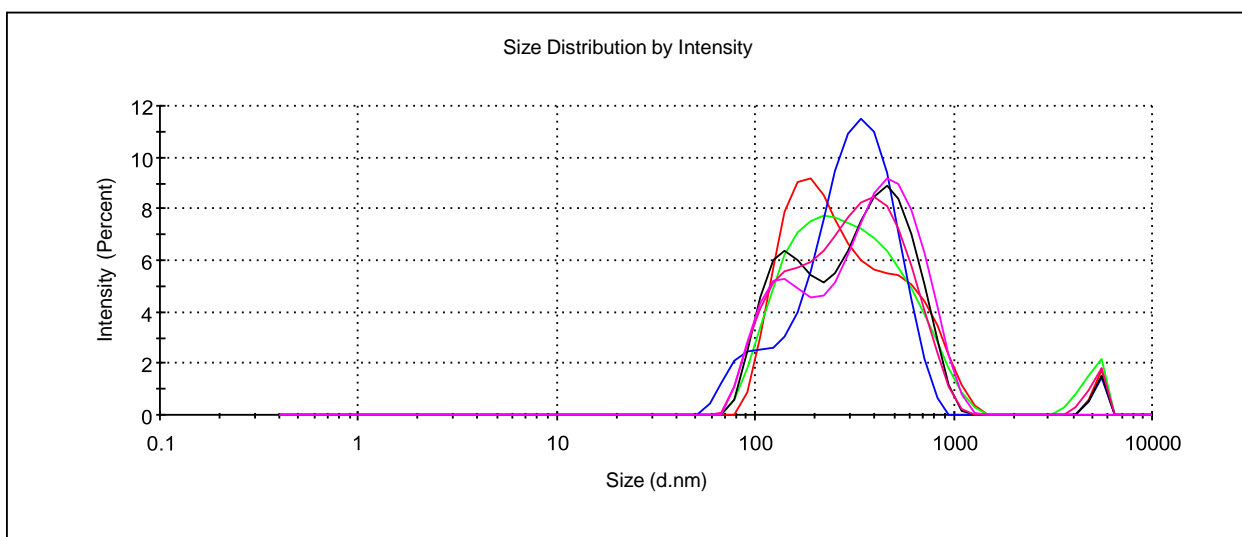

**Figure S32.** Size distribution of 5,11,17,23-tetra-*tert*-butyl-25,26,27,28-tetrakis[(N-(3',3'-dimethyl-3'-{3''-sulfonatopropyl})ammoniumpropyl)-carbamoylmethoxy]-2,8,14,20-tetrathiocalix[4]arene(*1,3-alternate*) (**5**) in water ( $1 \times 10^{-4}$  M).

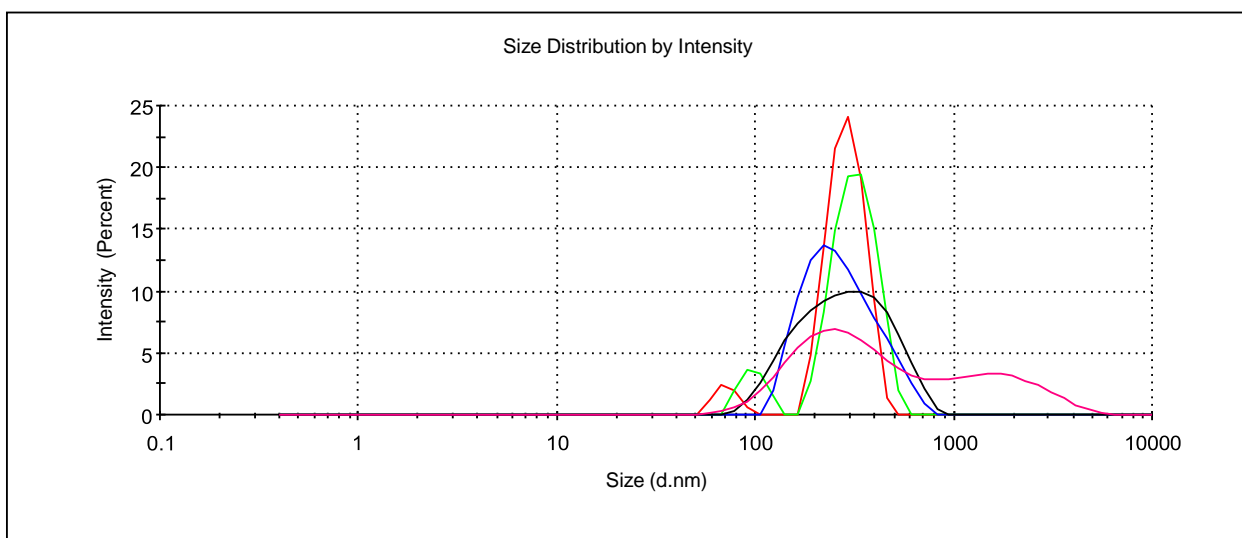

**Figure S33.** Size distribution of 5,11,17,23-tetra-*tert*-butyl-25,26,27,28-tetrakis[(N-(3',3'-dimethyl-3'-{3''-sulfonatopropyl})ammoniumpropyl)-carbamoylmethoxy]-2,8,14,20-tetrathiocalix[4]arene(1,3-*alternate*) (**5**) in water ( $1 \times 10^{-5}$  M).

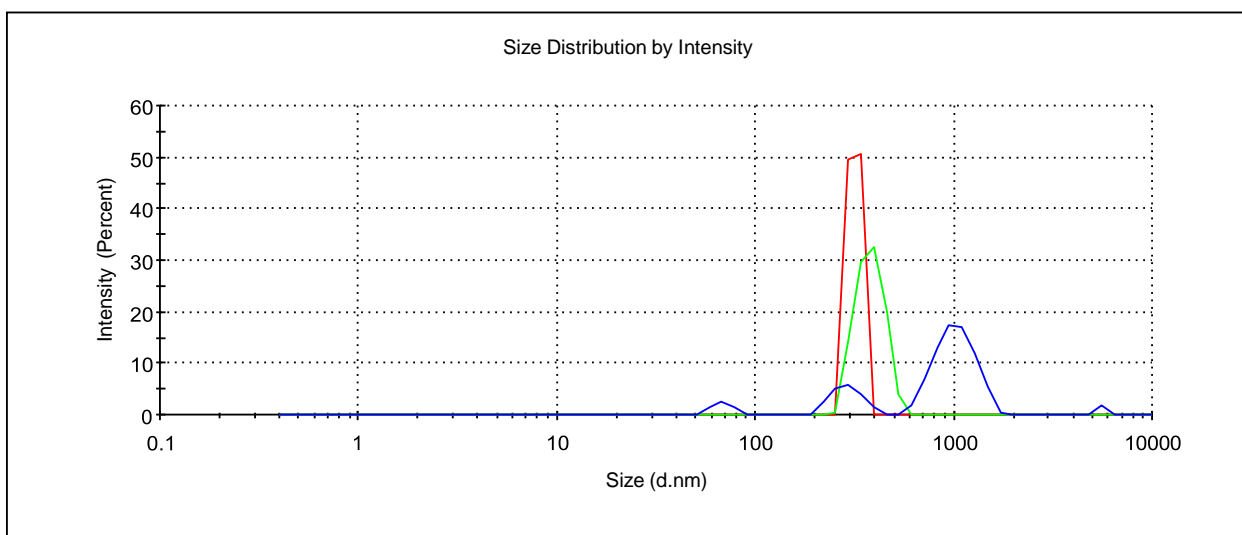

**Figure S34.** Size distribution of 5,11,17,23-tetra-*tert*-butyl-25,26,27,28-tetrakis[(N-(3',3'-dimethyl-3'-{3''-sulfonatopropyl})ammoniumpropyl)-carbamoylmethoxy]-2,8,14,20-tetrathiocalix[4]arene(1,3-*alternate*) (**5**) in water ( $1 \times 10^{-6}$  M).

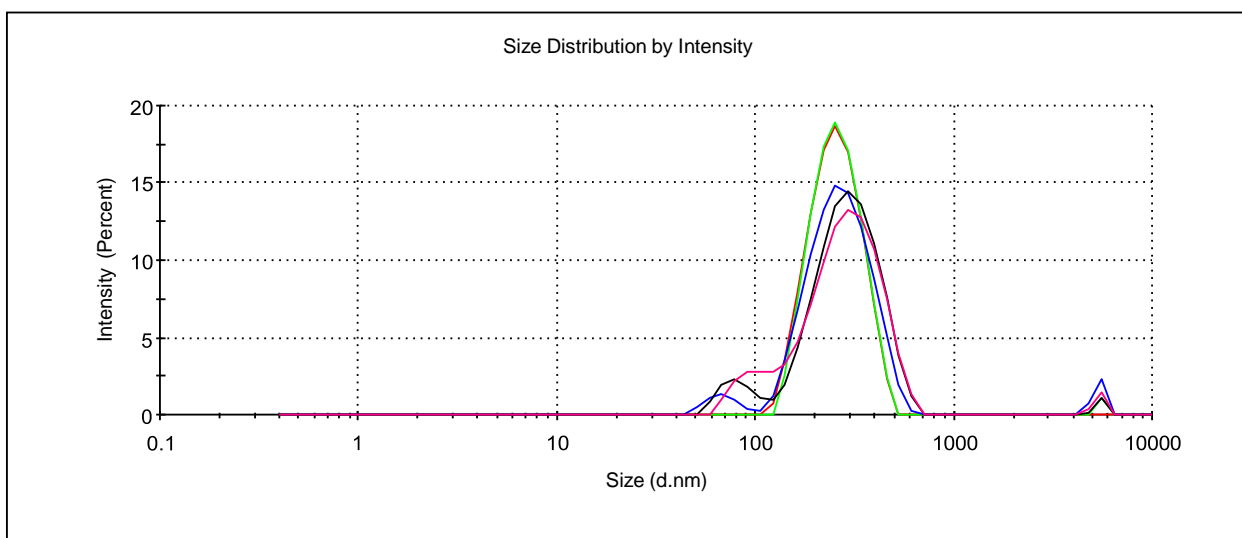

**Figure S35.** Size distribution of 5,11,17,23-tetra-*tert*-butyl-25,26,27,28-tetrakis[(N-(3',3'-dimethyl-3'-{3''-sulfonatopropyl})ammoniumpropyl)-carbamoylmethoxy]-2,8,14,20-tetrathiocalix[4]arene(1,3-*alternate*) (**5**) in the presence of Ag<sup>I</sup> in water ( $1 \times 10^{-4}$  M), (1:1).

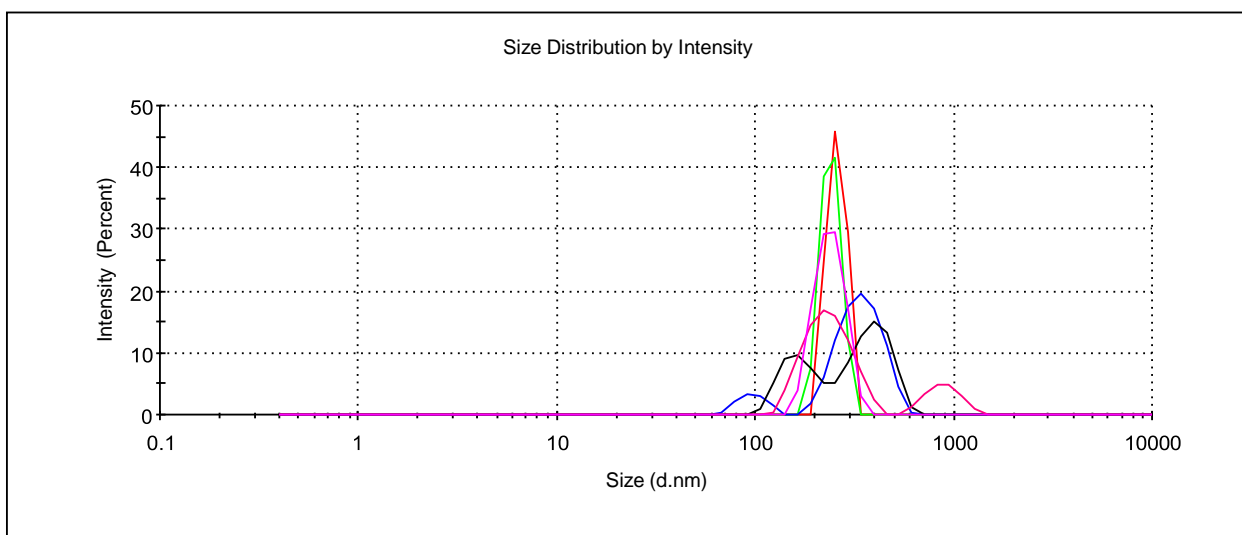

**Figure S36.** Size distribution of 5,11,17,23-tetra-*tert*-butyl-25,26,27,28-tetrakis[(N-(3',3'-dimethyl-3'-{3''-sulfonatopropyl})ammoniumpropyl)-carbamoylmethoxy]-2,8,14,20-tetrathiocalix[4]arene(1,3-*alternate*) (**5**) in the presence of Ag<sup>I</sup> in water ( $1 \times 10^{-5}$  M), (1:1).

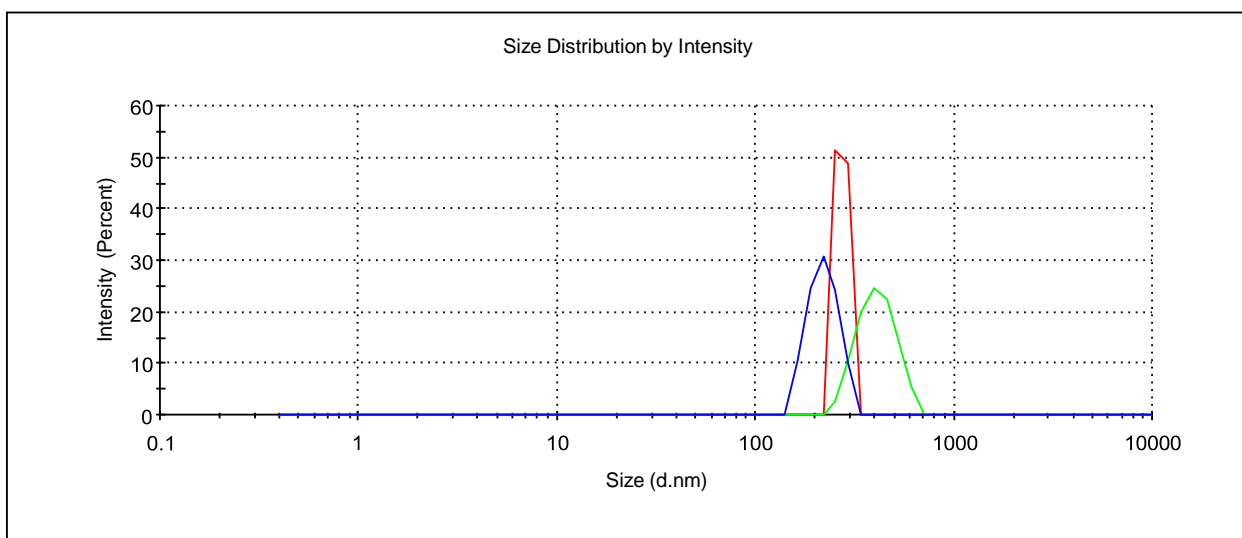

**Figure S37.** Size distribution of 5,11,17,23-tetra-*tert*-butyl-25,26,27,28-tetrakis[(N-(3',3'-dimethyl-3'-{3''-sulfonatopropyl})ammoniumpropyl)-carbamoylmethoxy]-2,8,14,20-tetrathiocalix[4]arene(1,3-*alternate*) (**5**) in the presence of Ag<sup>I</sup> in water ( $1 \times 10^{-6}$  M), (1:1).

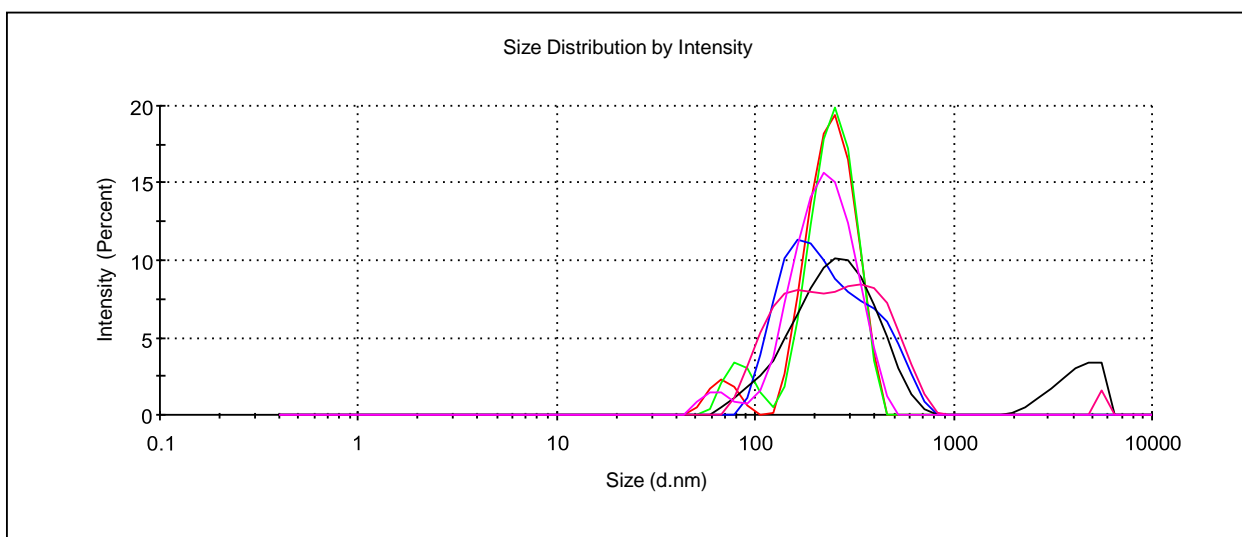

**Figure S38.** Size distribution of 5,11,17,23-tetra-*tert*-butyl-25,26,27,28-tetrakis[(N-(3',3'-dimethyl-3'-{3''-sulfonatopropyl})ammoniumpropyl)-carbamoylmethoxy]-2,8,14,20-tetrathiocalix[4]arene(1,3-*alternate*) (**5**) in the presence of Ag<sup>I</sup> in water ( $1 \times 10^{-4}$  M), (1:4).

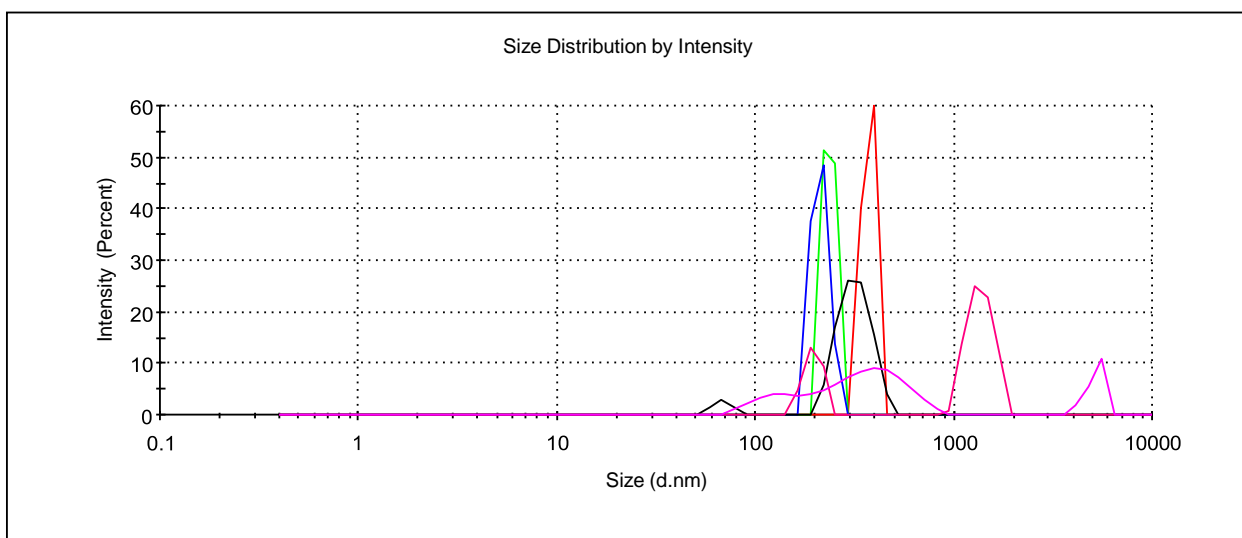

**Figure S39.** Size distribution of 5,11,17,23-tetra-*tert*-butyl-25,26,27,28-tetrakis[(N-(3',3'-dimethyl-3'-{3''-sulfonatopropyl})ammoniumpropyl)-carbamoylmethoxy]-2,8,14,20-tetrathiocalix[4]arene(1,3-*alternate*) (**5**) in the presence of  $\text{Ag}^{\text{I}}$  in water ( $1 \times 10^{-5}$  M), (1:4).

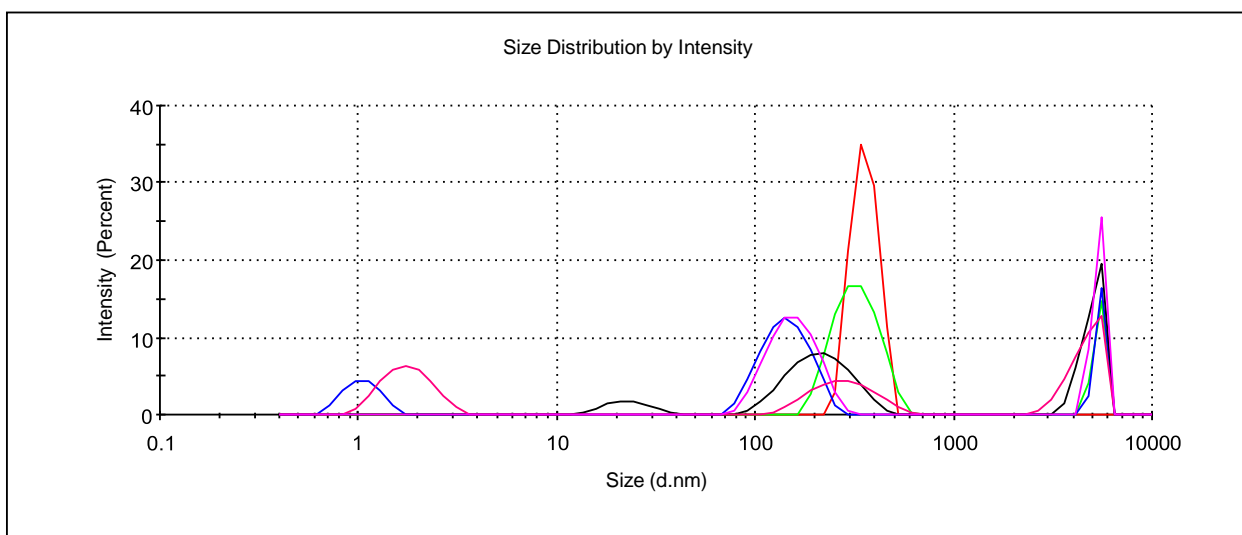

**Figure S40.** Size distribution of 5,11,17,23-tetra-*tert*-butyl-25,26,27,28-tetrakis[(N-(3',3'-dimethyl-3'-{3''-sulfonatopropyl})ammoniumpropyl)-carbamoylmethoxy]-2,8,14,20-tetrathiocalix[4]arene(1,3-*alternate*) (**5**) in the presence of  $\text{Ag}^{\text{I}}$  in water ( $1 \times 10^{-6}$  M), (1:4).

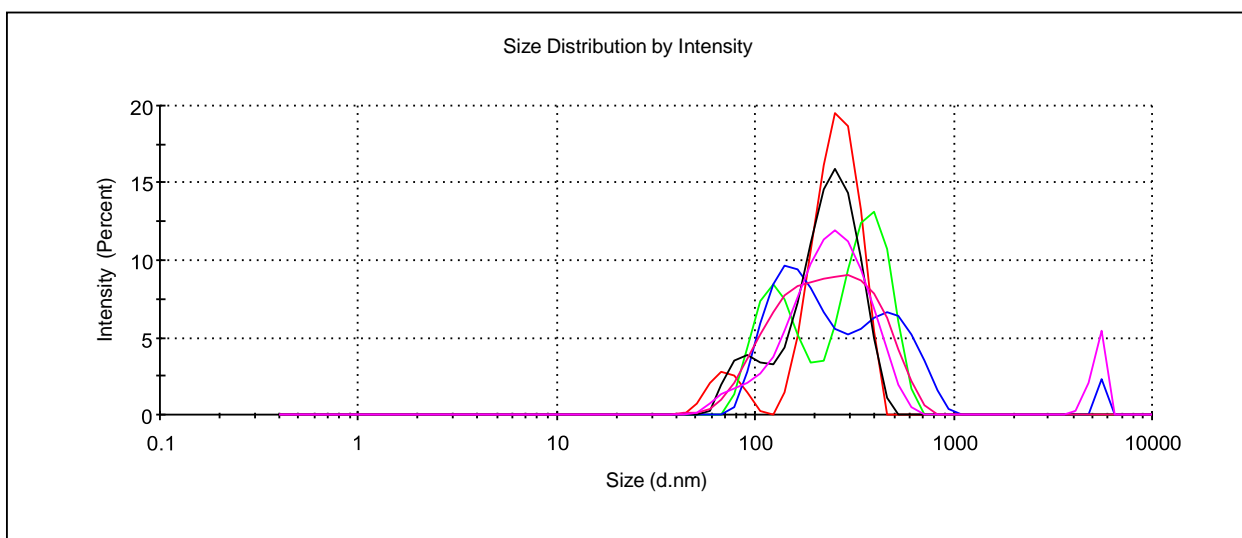

**Figure S41.** Size distribution of 5,11,17,23-tetra-*tert*-butyl-25,26,27,28-tetrakis[(N-(3',3'-dimethyl-3'-{3''-sulfonatopropyl})ammoniumpropyl)-carbamoylmethoxy]-2,8,14,20-tetrathiacalix[4]arene(1,3-*alternate*) (**5**) in the presence of  $\text{Ag}^{\text{I}}$  in water ( $1 \times 10^{-4}$  M), (1:10).

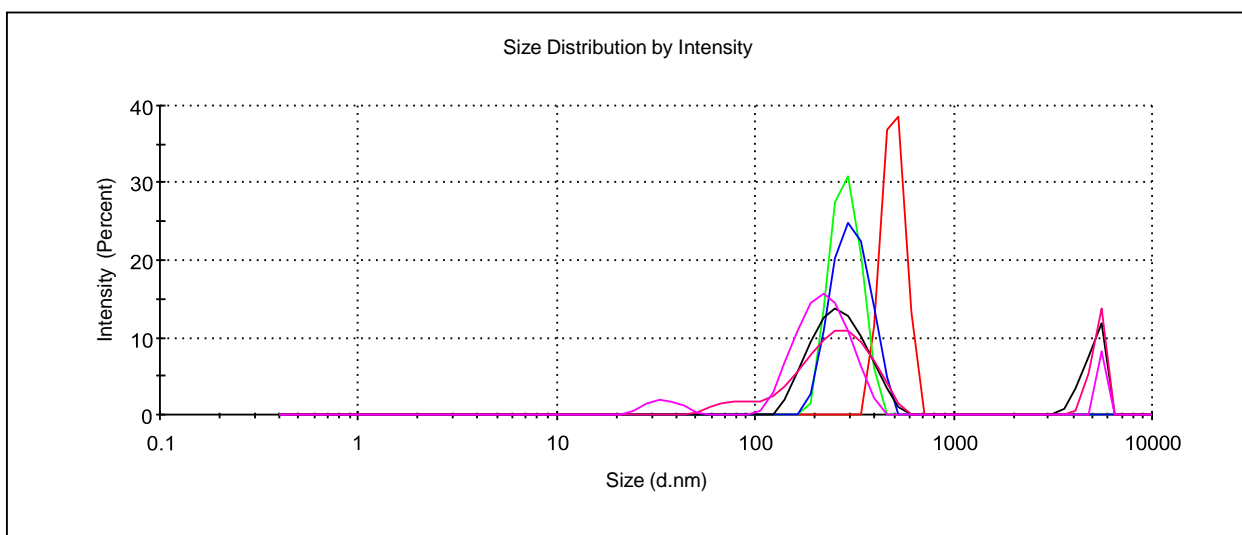

**Figure S42.** Size distribution of 5,11,17,23-tetra-*tert*-butyl-25,26,27,28-tetrakis[(N-(3',3'-dimethyl-3'-{3''-sulfonatopropyl})ammoniumpropyl)-carbamoylmethoxy]-2,8,14,20-tetrathiacalix[4]arene(1,3-*alternate*) (**5**) in the presence of  $\text{Ag}^{\text{I}}$  in water ( $1 \times 10^{-5}$  M), (1:10).

### 3. UV spectra

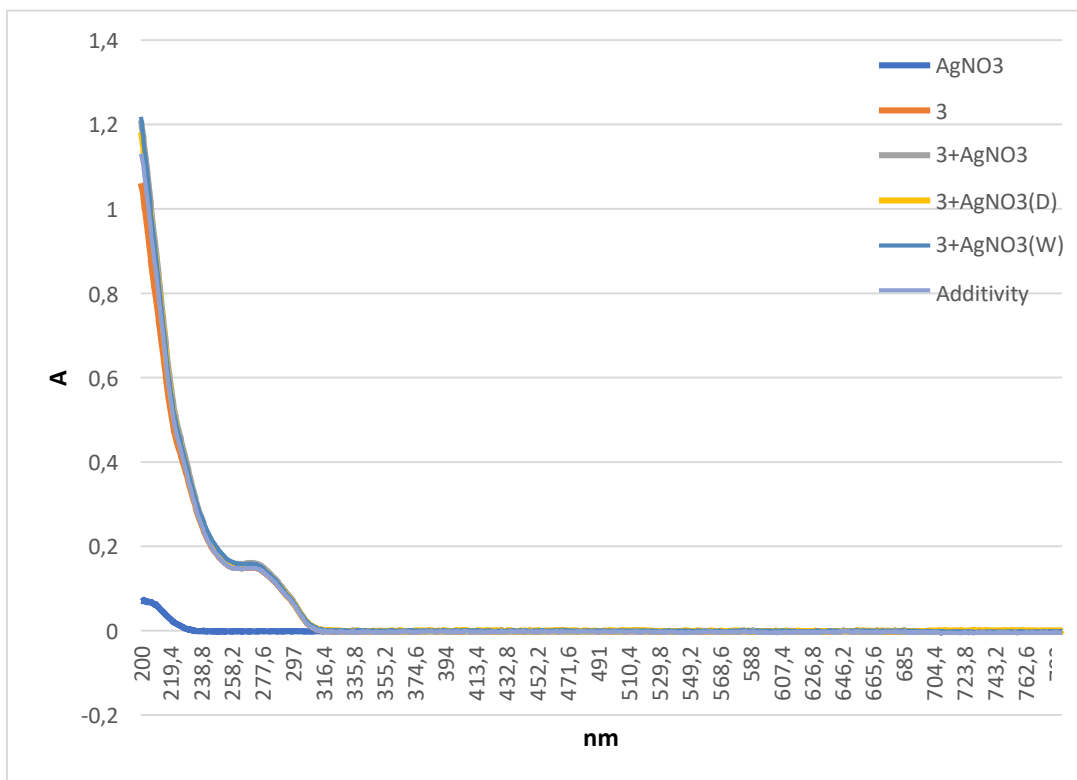

**Figure S43.** UV-*vis* spectra of AgNO<sub>3</sub> in the presence of **3** ( $1 \times 10^{-5}$  M), (UV spectra of the solutions were recorded on the day of their preparation, after 1 (D) and after 7 days (W)).

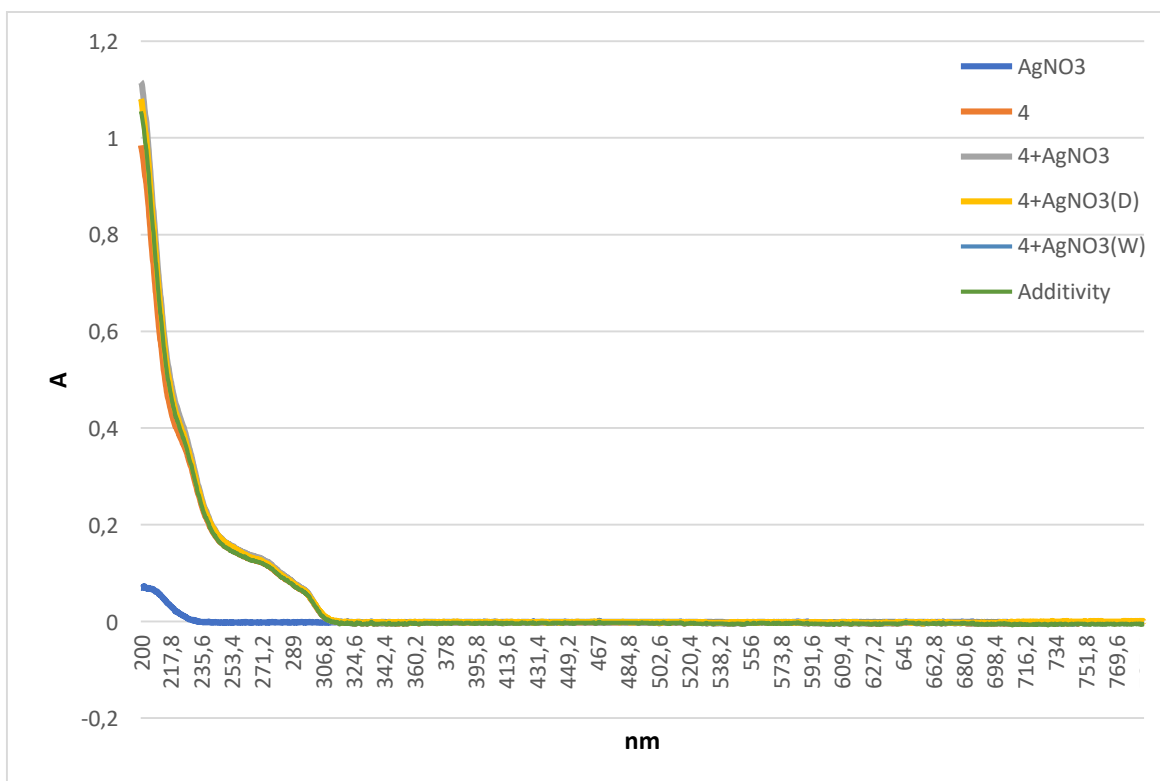

**Figure S44.** UV-*vis* spectra of AgNO<sub>3</sub> in the presence of **4** ( $1 \times 10^{-5}$  M), (UV spectra of the solutions were recorded on the day of their preparation, after 1 (D) and after 7 days (W)).



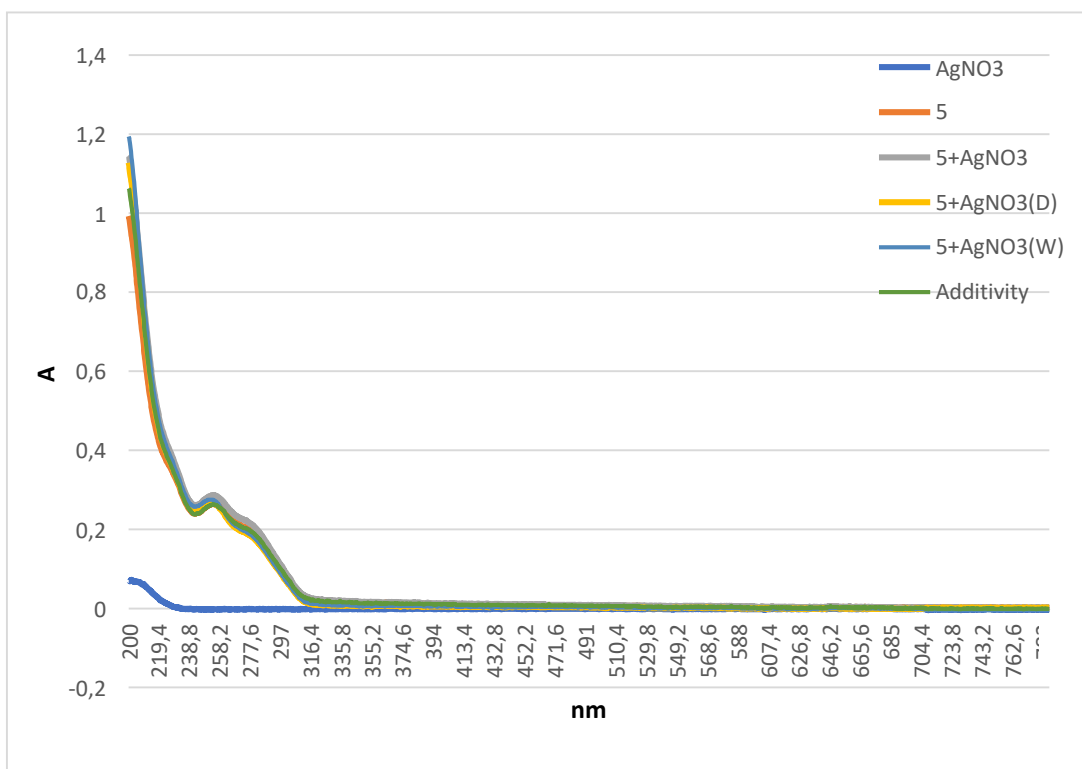

**Figure S45.** UV-*vis* spectra of AgNO<sub>3</sub> in the presence of **5** ( $1 \times 10^{-5}$  M), (UV spectra of the solutions were recorded on the day of their preparation, after 1 (D) and after 7 days (W)).

#### 4. NMR spectra of associates.

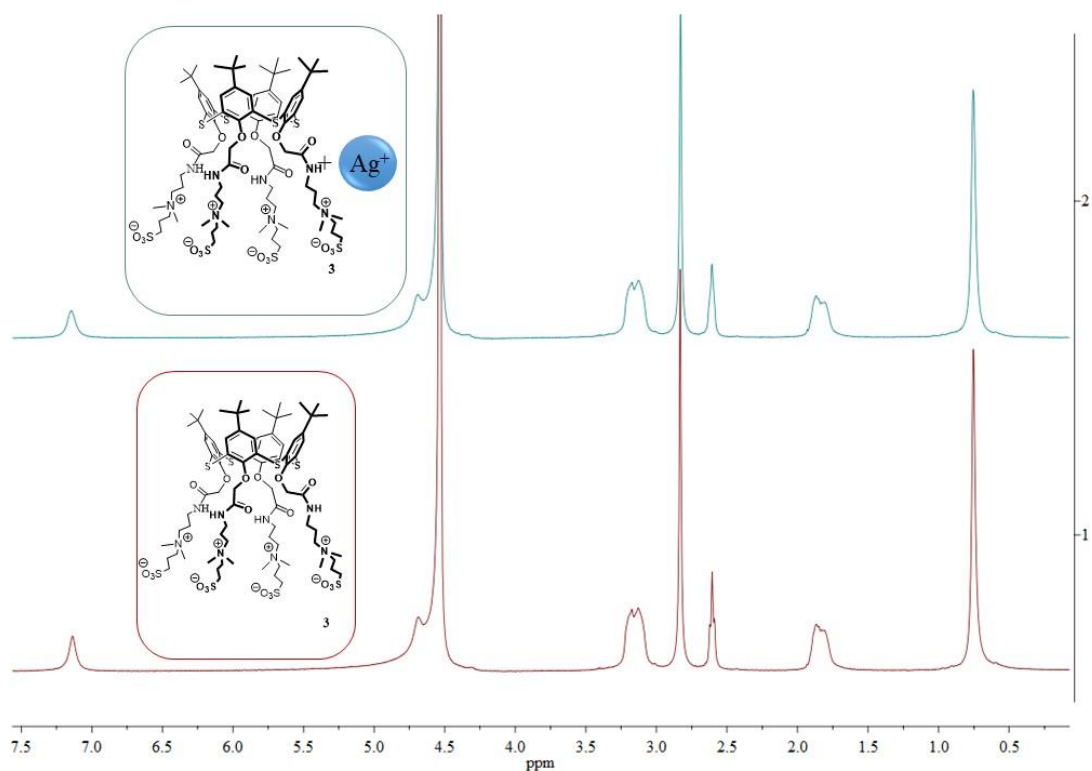

**Figure S46.**  $^1\text{H}$  NMR spectra of macrocycle **3** ( $1 \times 10^{-3}$  M) and associates **3**/ $\text{Ag}^+$  at a ratio of 1:4 in  $\text{D}_2\text{O}$  at 298 K.

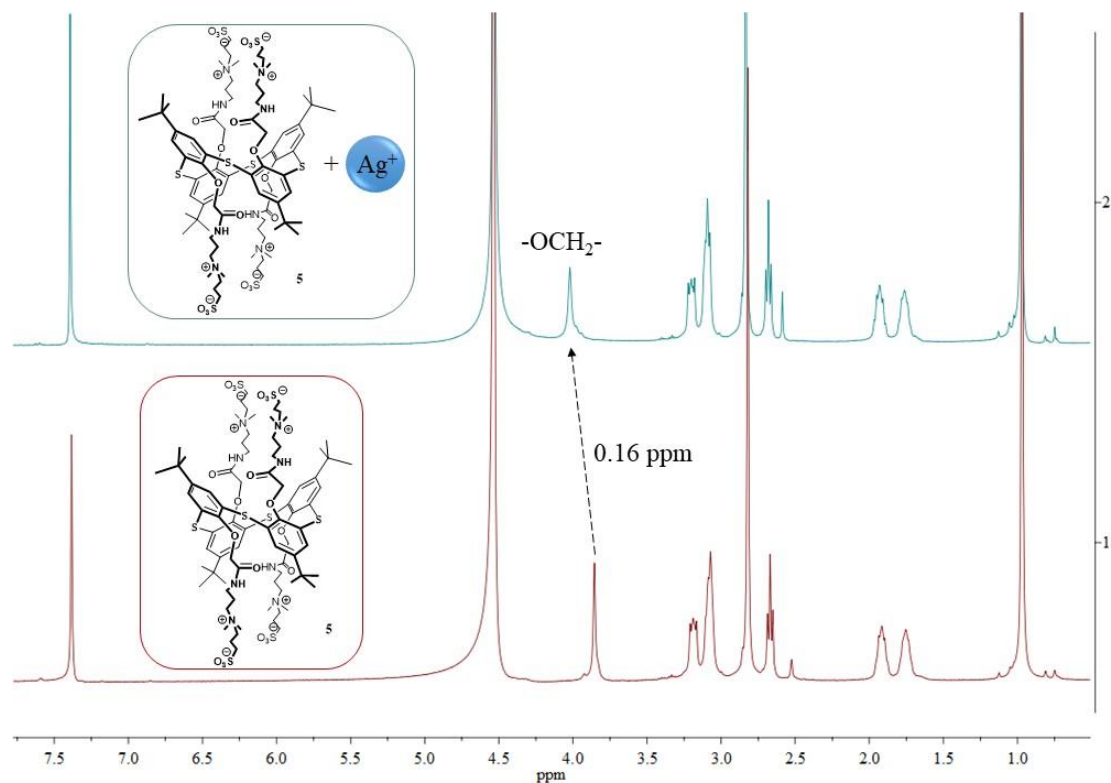

**Figure S47.**  $^1\text{H}$  NMR spectra of macrocycle **5** ( $1 \times 10^{-3}$  M) and associates **5**/ $\text{Ag}^+$  at a ratio of 1:4 in  $\text{D}_2\text{O}$  at 298 K.

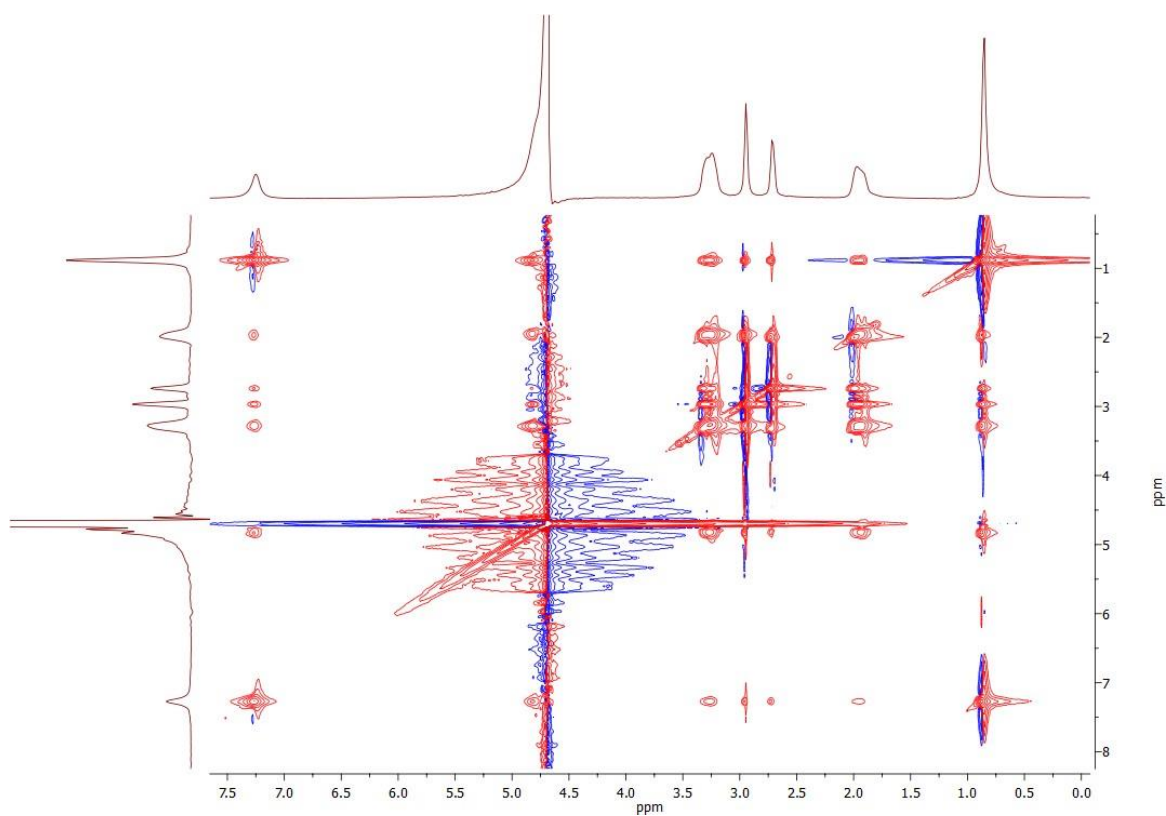

**Figure S48.** 2D  $^1\text{H}$ - $^1\text{H}$  NOESY NMR spectra of macrocycle **3** ( $1 \cdot 10^{-3}$  M) in  $\text{D}_2\text{O}$  at 298 K.

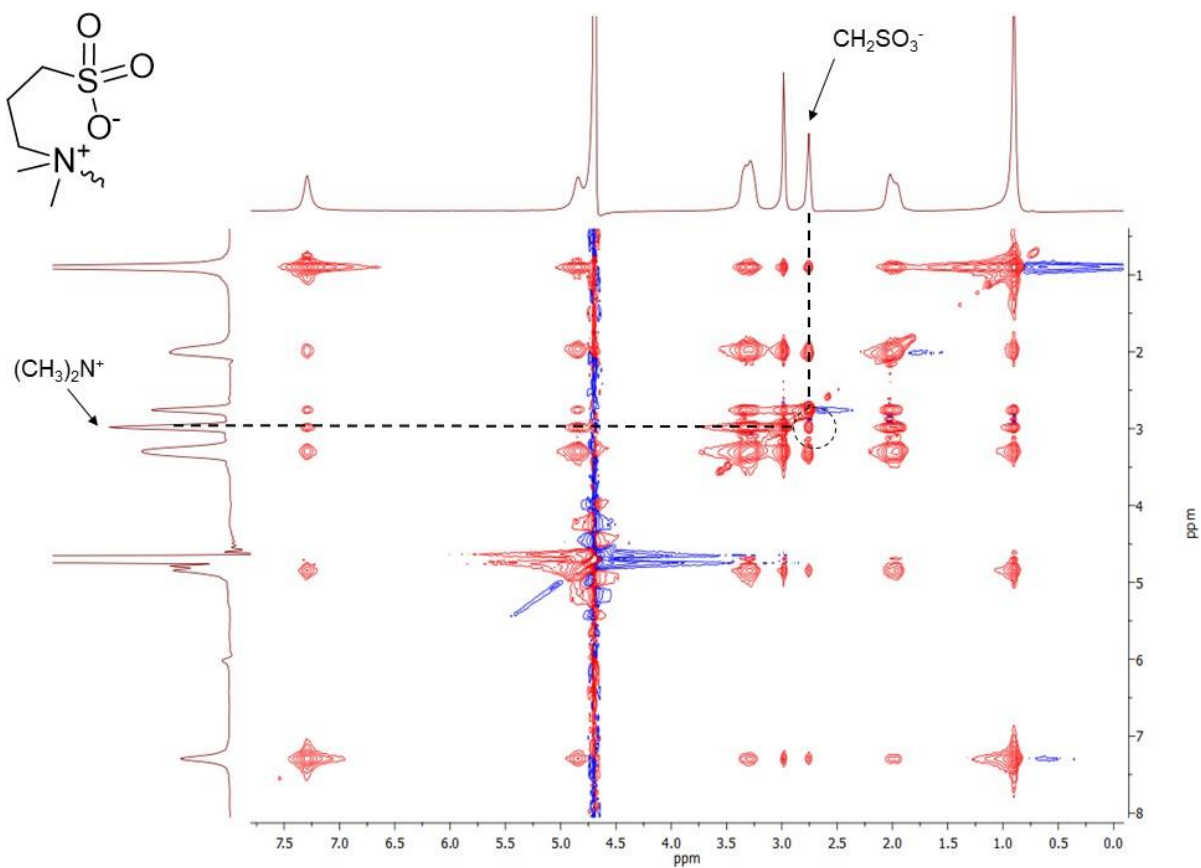

**Figure S49.** 2D  $^1\text{H}$ - $^1\text{H}$  NOESY NMR spectra of associates **3**/ $\text{Ag}^+$  at a ratio of 1:4 ( $1 \cdot 10^{-3}$  M) in  $\text{D}_2\text{O}$  at 298 K.

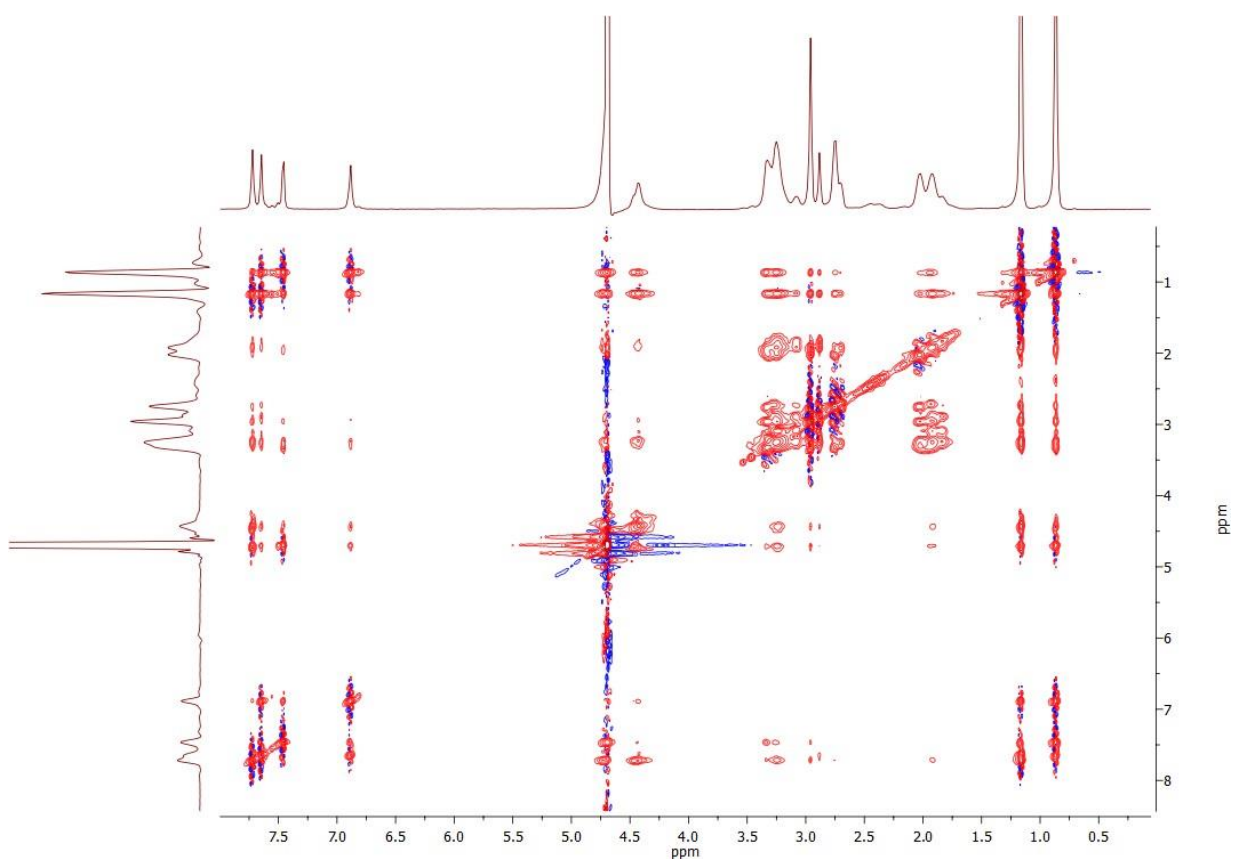

**Figure S50.** 2D  $^1\text{H}$ - $^1\text{H}$  NOESY NMR spectra of macrocycle **4** ( $1 \times 10^{-3}$  M) in  $\text{D}_2\text{O}$  at 298 K.

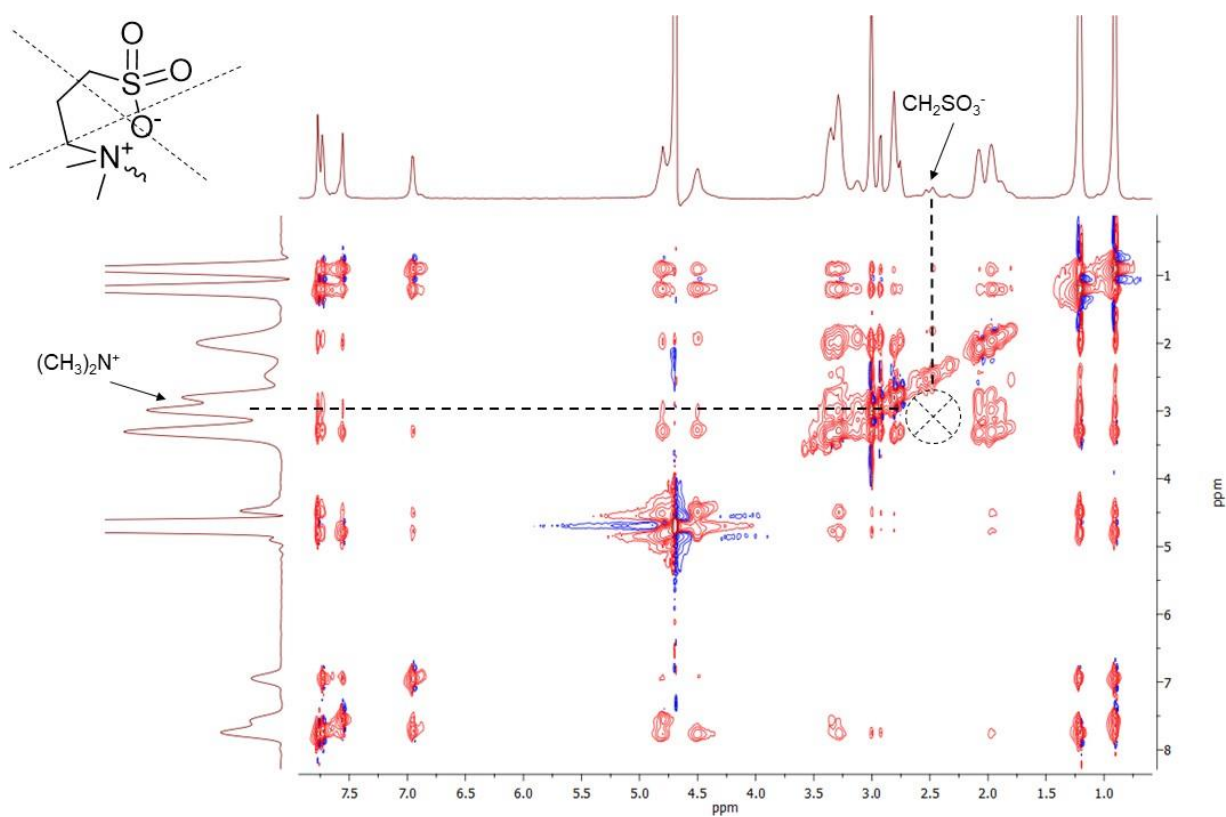

**Figure S51.** 2D  $^1\text{H}$ - $^1\text{H}$  NOESY NMR spectra of associates **4**/ $\text{Ag}^+$  at a ratio of 1:4 ( $1 \times 10^{-3}$  M) in  $\text{D}_2\text{O}$  at 298 K.

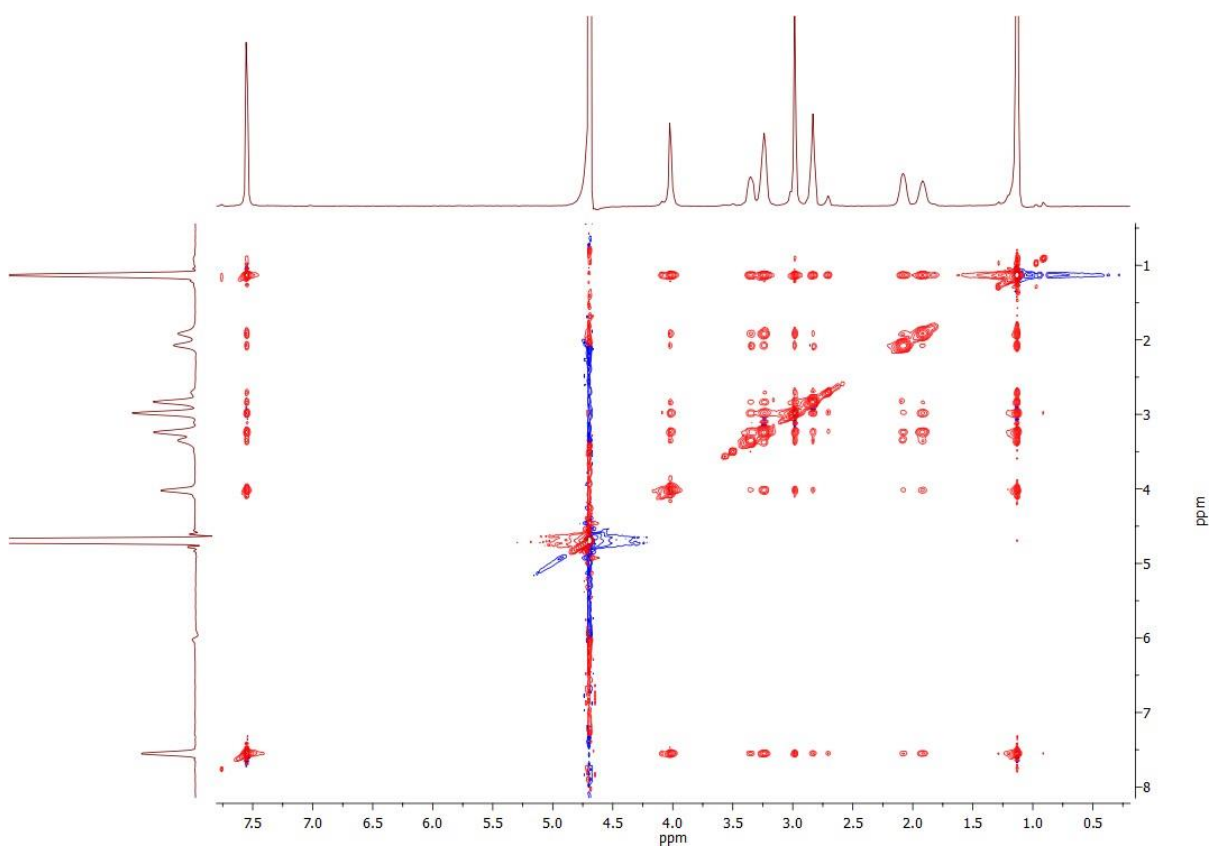

**Figure S52.** 2D  $^1\text{H}$ - $^1\text{H}$  NOESY NMR spectra of macrocycle **5** ( $1 \times 10^{-3}$  M) in  $\text{D}_2\text{O}$  at 298 K.

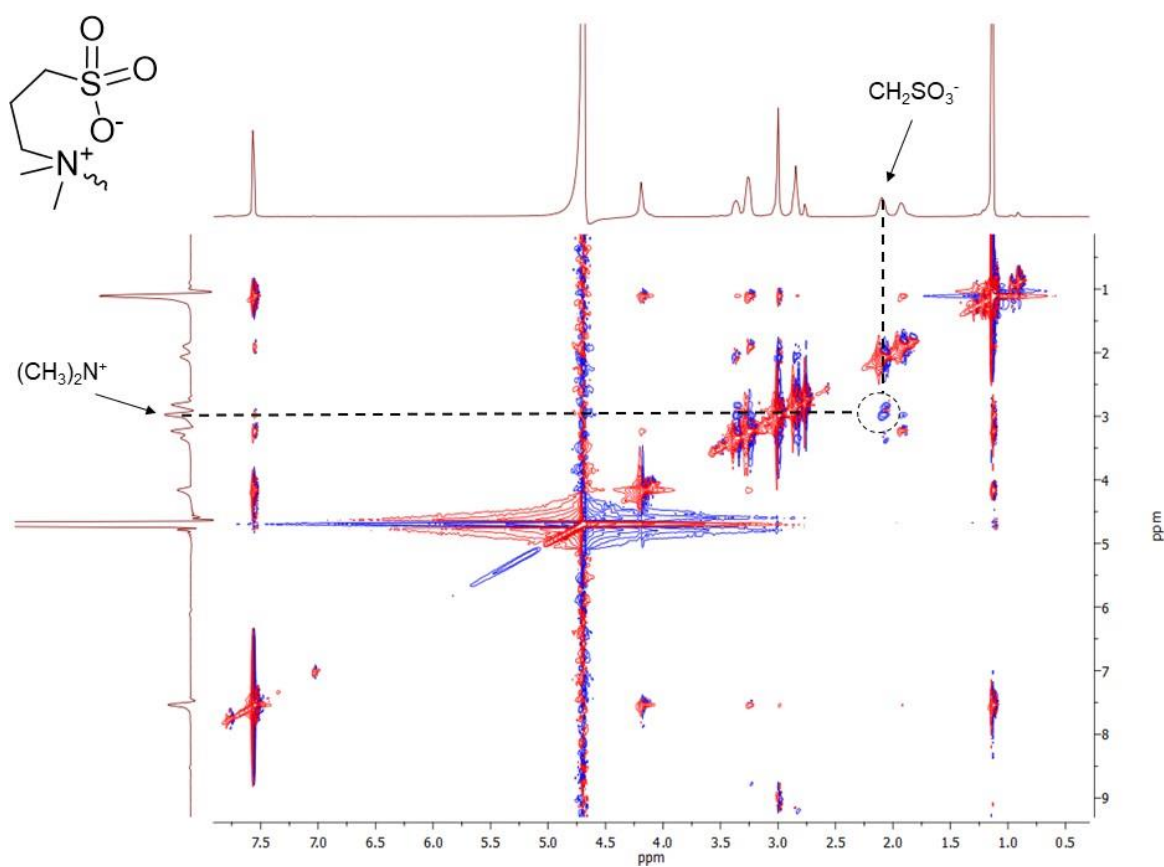

**Figure S53.** 2D  $^1\text{H}$ - $^1\text{H}$  NOESY NMR spectra of associates **5**/ $\text{Ag}^+$  at a ratio of 1:4 ( $1 \times 10^{-3}$  M) in  $\text{D}_2\text{O}$  at 298 K.

## 5. Tables

**Table S1.** Size of aggregates formed during association of compound **3** in water in the presence / absence of Ag (I) (hydrodynamic diameters d, nm and PDI).

| <i>c</i> , mol/L   | <b>3</b>  |         | <b>3+Ag<sup>+</sup></b> |              | <b>3+Ag<sup>+</sup></b> |               | <b>3+Ag<sup>+</sup></b> |        |
|--------------------|-----------|---------|-------------------------|--------------|-------------------------|---------------|-------------------------|--------|
|                    |           |         | 1:1                     |              | 1:4                     |               | 1:10                    |        |
|                    | PDI       | d, nm   | PDI                     | d, nm        | PDI                     | d, nm         | PDI                     | d, nm  |
| $1 \times 10^{-4}$ | 0.82±0.15 | 421±74  | <b>0.17±0.02</b>        | <b>168±7</b> | <b>0.18±0.01</b>        | <b>243±13</b> | 0.30±0.05               | 817±48 |
| $1 \times 10^{-5}$ | 0.54±0.17 | 335±47  | 0.31±0.06               | 152±27       | 0.27±0.03               | 756±93        | 0.75±0.16               | 446±92 |
| $1 \times 10^{-6}$ | 0.48±0.33 | 317±203 | 0.52±0.12               | 193±32       | 0.35±0.09               | 234±50        | -                       | -      |

**Table S2.** Size of aggregates formed during association of compound **4** in water in the presence / absence of Ag (I) (hydrodynamic diameters d, nm and PDI).

| <i>c</i> , mol/L   | <b>4</b>  |        | <b>4+Ag<sup>+</sup></b> |               | <b>4+Ag<sup>+</sup></b> |              | <b>4+Ag<sup>+</sup></b> |              |
|--------------------|-----------|--------|-------------------------|---------------|-------------------------|--------------|-------------------------|--------------|
|                    |           |        | 1:1                     |               | 1:4                     |              | 1:10                    |              |
|                    | PDI       | d, nm  | PDI                     | d, nm         | PDI                     | d, nm        | PDI                     | d, nm        |
| $1 \times 10^{-4}$ | 0.38±0.12 | 201±32 | <b>0.21±0.01</b>        | <b>182±11</b> | <b>0.19±0.01</b>        | <b>123±6</b> | <b>0.27±0.02</b>        | <b>147±7</b> |
| $1 \times 10^{-5}$ | 0.31±0.15 | 143±96 | 0.34±0.11               | 285±60        | 0.35±0.11               | 249±58       | 0.36±0.06               | 235±37       |
| $1 \times 10^{-6}$ | -         | -      | -                       | -             | -                       | -            | -                       | -            |

**Table S3.** Size of aggregates formed during association of compound **5** in water in the presence / absence of Ag (I) (hydrodynamic diameters d, nm and PDI).

| <i>c</i> , mol/L   | <b>5</b>  |        | <b>5+Ag<sup>+</sup></b> |        | <b>5+Ag<sup>+</sup></b> |        | <b>5+Ag<sup>+</sup></b> |        |
|--------------------|-----------|--------|-------------------------|--------|-------------------------|--------|-------------------------|--------|
|                    |           |        | 1:1                     |        | 1:4                     |        | 1:10                    |        |
|                    | PDI       | d, nm  | PDI                     | d, nm  | PDI                     | d, nm  | PDI                     | d, nm  |
| $1 \times 10^{-4}$ | 0.38±0.02 | 381±65 | 0.35±0.05               | 298±13 | 0.45±0.04               | 274±50 | 0.52±0.04               | 260±62 |
| $1 \times 10^{-5}$ | 0.52±0.09 | 289±46 | 0.60±0.08               | 284±62 | 0.86±0.21               | 306±78 | 0.70±0.17               | 273±31 |
| $1 \times 10^{-6}$ | 0.91±0.13 | 351±45 | 0.97±0.05               | 249±36 | 0.82±0.12               | 243±97 | -                       | -      |

**Table S4.** Size of aggregates formed during association of compounds **3** and **4** in water in the presence / absence of Ag (I) (hydrodynamic diameters d, nm and PDI).

| <i>c</i> , mol/L   | <b>3</b>  |         | <b>3+Ag<sup>+</sup></b><br>1:4 |               | <b>4</b>  |           | <b>4+Ag<sup>+</sup></b><br>1:4 |              |
|--------------------|-----------|---------|--------------------------------|---------------|-----------|-----------|--------------------------------|--------------|
|                    | PDI       | d, nm   | PDI                            | d, nm         | PDI       | d, nm     | PDI                            | d, nm        |
| $1 \times 10^{-4}$ | 0.82±0.15 | 421±74  | <b>0.18±0.01</b>               | <b>243±13</b> | 0.38±0.12 | 0.38±0.12 | <b>0.19±0.01</b>               | <b>123±6</b> |
| $1 \times 10^{-5}$ | 0.54±0.17 | 335±47  | 0.27±0.03                      | 756±93        | 0.31±0.15 | 0.31±0.15 | 0.35±0.11                      | 249±58       |
| $1 \times 10^{-6}$ | 0.48±0.33 | 317±203 | 0.35±0.09                      | 234±50        | -         | -         | -                              | -            |
